# Supplementary material for: Glycogen Synthase Kinase (GSK) 3β Phosphorylates and Protects Nuclear Myosin 1c from Proteasome-Mediated Degradation to Activate rDNA Transcription in Early G1 Cells
Source: PLoS Genet. 2014 Jun 5;10(6):e1004390. doi: 10.1371/journal.pgen.1004390 (PMC4046919; doi:10.1371/journal.pgen.1004390)
Supplement: Table S2 — Mass spectrometry identification of the fraction of proteins co-immunoprecipitated with the anti-NM1 antibody from total lysates of untreated GSK3β+/+MEFs. (XLS) [file pgen.1004390.s010.xls]

## Sheet: Sheet1
Table S2. Mass spectrometry identification of the fraction of proteins co-immunoprecipitated with the anti-NM1 antibody from total lysates
of untreated GSK3b+/+ MEFs (related to Figure 6)
Accession	Description	Molecular Function	Cellular Component	Biological Process	MW [kDa]
IPI01027496.1	108 kDa protein	nucleotide binding; catalytic activity	nucleus; membrane	metabolic process	108.271
	A2	ΔCn	IonScore	Exp Value	RT [min]
	High	0	47.05	0.00138267	112.857
IPI01027688.1	113 kDa protein	protein binding	cytoplasm; membrane	cell death; regulation of biological process	113.297
	A2	ΔCn	IonScore	Exp Value	RT [min]
	High	0	67.12	6.46315e-06	84.1975
	Medium	0	32.23	0.0318654	108.837
	Medium	0	31.98	0.0399972	44.6736
IPI00990435.1	143 kDa protein	protein binding; nucleotide binding	chromosome; nucleus; organelle lumen	metabolic process; regulation of biological process; cell organization and biogenesis	142.944
	A2	ΔCn	IonScore	Exp Value	RT [min]
	High	0	52.38	0.000338475	93.7222
	A2	ΔCn	IonScore	Exp Value	RT [min]
	High	0	64.03	2.53232e-05	87.9239
	High	0	56.11	0.000112045	44.0469
	High	0	54.74	0.000283363	51.7126
	High	0	51.92	8.16213e-05	56.3906
	High	0	43.57	0.00305921	48.5904
	High	0	41.28	0.00380186	77.4923
	High	0	33.36	0.0232504	34.5206
IPI00311203.2	1-phosphatidylinositol-4,5-bisphosphate phosphodiesterase beta-3	catalytic activity; signal transducer activity; metal ion binding; protein binding	nucleus; cytoplasm; cytosol; membrane	metabolic process; transport; cell communication; regulation of biological process; response to stimulus	139.4
	A2	ΔCn	IonScore	Exp Value	RT [min]
	High	0	60	5.62e-05	123.723
	A2	ΔCn	IonScore	Exp Value	RT [min]
	High	0	53.96	0.000130381	94.4637
	High	0	52.73	9.33336e-05	48.1091
	High	0	43.15	0.00196816	121.06
IPI00123494.3	26S proteasome non-ATPase regulatory subunit 2	protein binding; enzyme regulator activity	proteasome	metabolic process; regulation of biological process	100.139
	A2	ΔCn	IonScore	Exp Value	RT [min]
	High	0	58.37	4.43915e-05	29.9457
	High	0	37.51	0.00750482	31.8143
	High	0	36.4	0.00467337	127.737
	A2	ΔCn	IonScore	Exp Value	RT [min]
	High	0	44.62	0.0026507	74.929
	Medium	0	31.23	0.034014	74.7122
	A2	ΔCn	IonScore	Exp Value	RT [min]
	High	0	39.04	0.00798949	70.655
	Medium	0	32.7	0.0326515	30.0951
	A2	ΔCn	IonScore	Exp Value	RT [min]
	High	0	46.35	0.00150283	93.4479
	A2	ΔCn	IonScore	Exp Value	RT [min]
	High	0	64.55	2.30444e-05	43.0489
	High	0	46.13	0.00156142	31.357
	High	0	40.72	0.00319828	33.7222
	High	0	36.29	0.00902259	16.5522
	A2	ΔCn	IonScore	Exp Value	RT [min]
	High	0	72.9	3.37463e-06	97.4923
	High	0	35.77	0.0116931	80.2529
	High	0	28.36	0.0104305	62.1101
	A2	ΔCn	IonScore	Exp Value	RT [min]
	High	0	73.05	3.41117e-06	109.316
	High	0	51.02	0.000443966	97.6668
	High	0	50.27	0.000607531	45.8883
	High	0	44.52	0.00175532	60.8325
	High	0	41.54	0.00448581	75.7077
	High	0	39.69	0.00541291	15.5098
	High	0	36.34	0.0135067	40.3679
	High	0	34.73	0.0183399	63.5477
	Medium	0	30.81	0.0509528	37.2499
	A2	ΔCn	IonScore	Exp Value	RT [min]
	High	0	32.76	0.0143539	128.899
IPI00331461.4	60S ribosomal protein L11	RNA binding; structural molecule activity; protein binding	nucleus; organelle lumen; cytoplasm; ribosome; cytosol	metabolic process; transport	20.2396
	A2	ΔCn	IonScore	Exp Value	RT [min]
	High	0	39.51	0.00788084	52.7466
	High	0	36.84	0.00809425	53.2296
	High	0	34.23	0.0191618	66.5871
	A2	ΔCn	IonScore	Exp Value	RT [min]
	High	0	58.45	0.000108524	73.5504
	High	0	42.57	0.00348334	36.9664
	High	0	40.14	0.00672953	50.1529
	High	0	36.69	0.00190717	47.0368
	Medium	0	25.06	0.0427288	75.8384
	A2	ΔCn	IonScore	Exp Value	RT [min]
	High	0	39.56	0.000692651	46.6003
	A2	ΔCn	IonScore	Exp Value	RT [min]
	High	0	41.12	0.00261939	86.2477
	A2	ΔCn	IonScore	Exp Value	RT [min]
	High	0	90.46	3.27417e-08	64.6643
	High	0	83.5	2.90791e-07	57.0159
	High	0	72	3.20842e-06	101.494
	High	0	71.69	4.16072e-06	56.4491
	High	0	68.67	7.27377e-06	72.048
	High	0	62.57	4.29123e-05	45.368
	High	0	55.6	0.000200646	83.8619
	High	0	52.55	0.000365507	56.5142
	High	0	46.63	0.00108744	61.4973
	High	0	44.92	0.00213235	31.3075
	High	0	42.92	0.00179953	69.184
	High	0	42.5	0.000646693	50.6305
	High	0	41.09	0.00591308	51.1474
	High	0	37.35	0.0107685	43.6549
	High	0	36.55	0.018081	59.8816
	High	0	35.86	0.0162525	73.1083
IPI00874946.2	830 kDa protein	protein binding; metal ion binding	cytoskeleton; membrane	regulation of biological process	829.327
	A2	ΔCn	IonScore	Exp Value	RT [min]
	High	0	78.68	3.67934e-07	97.567
	High	0	75.44	2.28893e-06	53.6598
	High	0	74.6	1.40949e-06	59.8793
	High	0	73.29	3.07307e-06	59.7379
	High	0	72.17	3.84671e-06	83.0916
	High	0	71.01	5.45637e-06	72.4648
	High	0	68.67	9.51499e-06	102.47
	High	0	68.04	1.09062e-05	75.4028
	High	0	67.01	1.08989e-05	59.9565
	High	0	63.48	2.46361e-05	58.21
	High	0	62.53	3.52674e-05	53.7792
	High	0	62.44	1.94711e-05	77.8874
	High	0	61.9	3.77708e-05	41.2257
	High	0	60.12	7.38802e-05	35.2533
	High	0	58.18	8.21856e-05	112.89
	High	0	57.29	0.000133913	122.394
	High	0	56.53	0.000154187	53.6442
	High	0	52.87	0.000257434	111.548
	High	0	52.11	0.000258682	55.9499
	High	0	50.3	0.000440029	102.327
	High	0	49.42	0.000640583	30.8001
	High	0	47.65	0.00107799	86.9173
	High	0	46.63	0.00106136	72.6477
	High	0	44.3	0.000965992	63.6335
	High	0	43.8	0.00140693	42.7614
	High	0	43.37	0.00300778	80.1697
	High	0	43.11	0.00290015	61.0045
	High	0	42.78	0.00435755	101.637
	High	0	42.4	0.00298941	100.419
	High	0	41.97	0.00469827	68.6121
	High	0	40.97	0.00587878	17.2784
	High	0	40.91	0.00519421	58.8666
	High	0	39.97	0.00527632	30.939
	High	0	39.77	0.00317898	132.476
	High	0	39.12	0.00180019	121.26
	High	0	38.83	0.00417629	99.2318
	High	0	37.7	0.0051202	36.9623
	High	0	37.66	0.0108751	44.1947
	High	0	37.57	0.00604572	84.0034
	High	0	37.34	0.00993541	91.4632
	High	0	36.91	0.0112343	88.6501
	High	0	36.12	0.00492351	121.223
	High	0	35.51	0.0100385	57.7128
	High	0	35.43	0.0142922	74.0159
	High	0	33.4	0.0277681	59.9124
	Medium	0	32.41	0.0325811	81.5714
	High	0	32.06	0.0209404	127.292
	Medium	0	31.02	0.0558614	67.6097
	Medium	0	30.9	0.0381624	125.438
	Medium	0	30.48	0.0346954	127.416
	High	0	30.13	0.0187794	106.307
	Medium	0	29.95	0.044206	30.9948
	Medium	0	29.27	0.0379165	66.426
	Medium	0	26.14	0.0482792	46.0909
	Medium	0	25.74	0.0433365	85.2528
	A2	ΔCn	IonScore	Exp Value	RT [min]
	High	0	112.61	2.50563e-10	132.223
	High	0	99.66	3.06046e-09	92.8676
	High	0	95.43	2.02354e-08	70.122
	High	0	73.67	3.35683e-06	76.0212
	High	0	69.87	6.82116e-06	85.8322
	High	0	69.14	7.77715e-06	63.893
	High	0	67.71	7.52286e-06	80.1317
	High	0	63.24	8.44151e-06	85.6827
	High	0	62.78	2.32508e-05	115.092
	High	0	61.62	2.77871e-05	56.3883
	High	0	54.42	0.000127216	26.9689
	High	0	44.37	0.00165249	20.1549
	High	0	42.14	0.00274007	27.2349
	High	0	39.79	0.00407222	111.314
	High	0	39.31	0.00726175	42.959
	High	0	38.77	0.00463924	27.427
	High	0	38.04	0.00132696	17.7105
	High	0	37.83	0.00553783	31.4961
	High	0	37.54	0.00762055	22.533
	High	0	37.23	0.00759776	38.3585
	High	0	36.18	0.00832622	89.2197
	High	0	36	0.010575	95.184
	High	0	35.38	0.0153849	81.1626
	High	0	35.37	0.0106432	46.8145
	High	0	34.52	0.0214912	124.514
	High	0	33.51	0.0156203	56.9587
	High	0	33.28	0.0102672	24.2968
	High	0	32.42	0.0290694	75.1814
	High	0	31.25	0.0216344	83.225
	Medium	0	29.06	0.0582335	24.8212
	A2	ΔCn	IonScore	Exp Value	RT [min]
	High	0	112.61	2.50563e-10	132.223
	High	0	95.43	2.02354e-08	70.122
	High	0	73.67	3.35683e-06	76.0212
	High	0	72.95	2.59326e-06	104.181
	High	0	69.87	6.82116e-06	85.8322
	High	0	69.14	7.77715e-06	63.893
	High	0	67.71	7.52286e-06	80.1317
	High	0	62.78	2.32508e-05	115.092
	High	0	62.61	2.82363e-05	97.7882
	High	0	61.62	2.77871e-05	56.3883
	High	0	54.42	0.000127216	26.9689
	High	0	44.37	0.00165249	20.1549
	High	0	42.14	0.00274007	27.2349
	High	0	39.79	0.00407222	111.314
	High	0	39.31	0.00726175	42.959
	High	0	38.77	0.00463924	27.427
	High	0	38.04	0.00132696	17.7105
	High	0	37.83	0.00553783	31.4961
	High	0	37.54	0.00762055	22.533
	High	0	37.23	0.00759776	38.3585
	High	0	36.18	0.00832622	89.2197
	High	0	36	0.010575	95.184
	High	0	35.38	0.0153849	81.1626
	High	0	35.37	0.0106432	46.8145
	High	0	34.52	0.0214912	124.514
	High	0	33.51	0.0156203	56.9587
	High	0	33.28	0.0102672	24.2968
	High	0	32.42	0.0290694	75.1814
	High	0	31.25	0.0216344	83.225
	Medium	0	29.06	0.0582335	24.8212
IPI00404804.1	Actin, gamma-enteric smooth muscle	nucleotide binding	cytoplasm; cytoskeleton		41.8498
	A2	ΔCn	IonScore	Exp Value	RT [min]
	High	0	73.67	3.35683e-06	76.0212
	High	0	54.42	0.000127216	26.9689
	High	0	50.21	0.000377307	115.05
	High	0	44.37	0.00165249	20.1549
	High	0	42.5	0.00368896	42.1772
	High	0	42.14	0.00274007	27.2349
	High	0	38.77	0.00463924	27.427
	High	0	38.04	0.00132696	17.7105
	High	0	37.83	0.00553783	31.4961
	High	0	35.15	0.013961	54.6962
	High	0	33.51	0.0156203	56.9587
	High	0	33.28	0.0102672	24.2968
	Medium	0	29.06	0.0582335	24.8212
IPI00172197.2	Actin-binding protein anillin	protein binding	nucleus; cytoplasm; cytoskeleton	cell division; cell organization and biogenesis	122.718
	A2	ΔCn	IonScore	Exp Value	RT [min]
	High	0	40.15	0.00613442	19.3476
	A2	ΔCn	IonScore	Exp Value	RT [min]
	High	0	130.09	7.23353e-12	71.4955
	High	0	102.16	4.40594e-09	79.3619
	High	0	93.28	3.28221e-08	74.6572
	High	0	92.55	3.60226e-08	34.9819
	High	0	88.6	1.00216e-07	63.8134
	High	0	82.92	3.91302e-07	63.6442
	High	0	82.76	2.6033e-07	65
	High	0	82.75	3.89669e-07	47.5918
	High	0	81.05	2.0691e-07	66.6181
	High	0	73.01	2.9302e-06	74.1101
	High	0	72.38	2.80666e-06	54.282
	High	0	64.14	2.37647e-05	60.7148
	High	0	64.11	1.94657e-05	94.1442
	High	0	63.15	3.43036e-05	66.8047
	High	0	62.53	4.37841e-05	22.558
	High	0	62.19	4.02532e-05	78.656
	High	0	59.57	8.31923e-05	39.4369
	High	0	58.34	8.91053e-05	35.7403
	High	0	57.62	0.000142537	63.0563
	High	0	57.02	0.00014429	85.8298
	High	0	56.86	6.80008e-05	26.9362
	High	0	56.29	0.000164004	59.0111
	High	0	56.19	0.000213988	57.6026
	High	0	55.85	0.00016056	44.0814
	High	0	55.58	0.000110954	54.2868
	High	0	55.58	4.15041e-05	31.8413
	High	0	53.35	0.000270262	42.4173
	High	0	53.05	0.000374808	55.0424
	High	0	52.9	0.000234121	67.0559
	High	0	51.02	0.000389014	66.9114
	High	0	50.71	0.000216116	45.0609
	High	0	50.61	0.000395811	56.8888
	High	0	50.49	0.000462286	35.3702
	High	0	49.91	0.000735076	74.6437
	High	0	49.79	0.000746749	40.2244
	High	0	49.53	0.000662448	85.3766
	High	0	49.49	0.000570175	47.9741
	High	0	48.98	0.000943493	73.4987
	High	0	48.84	0.000910401	75.6986
	High	0	48.66	0.000821632	70.424
	High	0	48.24	0.000720599	71.1941
	High	0	47.55	0.000602968	32.446
	High	0	45.73	0.00123092	86.3773
	High	0	45.43	0.00134187	54.6877
	High	0	45.37	0.00121243	80.5278
	High	0	45.04	0.000726922	58.48
	High	0	44.96	0.00270802	62.0563
	High	0	44.91	0.00212596	67.0107
	High	0	44.38	0.00229248	67.0245
	High	0	44.07	0.00263446	46.9674
	High	0	43.96	0.00252927	77.0617
	High	0	43.96	0.00252927	77.0617
	High	0	43.57	0.00183289	51.4033
	High	0	43.34	0.00337853	72.0277
	High	0.3281	43.24	0.00277669	46.9225
	High	0	43.21	0.00200562	81.1063
	High	0	43.14	0.00377554	44.1482
	High	0	42.73	0.00226401	28.7813
	High	0	42.72	0.00453578	54.8946
	High	0	42.27	0.00295277	68.8493
	High	0	41.78	0.00371364	74.8685
	High	0	41.74	0.00155748	50.8309
	High	0	41.7	0.00457032	79.2857
	High	0	41.66	0.00364028	68.8452
	High	0	41.45	0.00311522	42.7865
	High	0	41.21	0.0044918	67.8414
	High	0	41.09	0.00468378	51.3475
	High	0	40.96	0.00451746	53.653
	High	0	40.7	0.00367266	80.3348
	High	0	40.44	0.00580595	50.1858
	High	0	40.21	0.0060836	48.3464
	High	0	40.09	0.00562717	39.6545
	High	0	39.98	0.00545506	51.6442
	High	0	39.6	0.00789464	53.3552
	High	0	39.43	0.00653933	79.4245
	High	0	39.38	0.00878931	51.9017
	High	0	39.1	0.00543164	37.9076
	High	0	38.98	0.00667781	35.5586
	High	0	38.97	0.00971655	36.6886
	High	0	38.95	0.00931568	78.1785
	High	0	38.81	0.0100417	42.0679
	High	0	38.8	0.00974192	58.8233
	High	0	38.2	0.0109658	64.5214
	High	0	38.04	0.00677612	81.2503
	High	0	37.98	0.00796104	11.8691
	High	0	37.8	0.0102397	54.1562
	High	0	37.7	0.0097649	51.1866
	High	0	37.21	0.0117011	76.8696
	High	0	36.74	0.0179955	46.8814
	High	0	36.71	0.012137	84.0545
	High	0	36.64	0.0147621	41.8312
	High	0	36.42	0.00860829	55.5207
	High	0	36.29	0.00993895	48.4809
	High	0	35.88	0.0184761	61.3302
	High	0	35.74	0.0126542	29.9035
	High	0	35.7	0.0183428	73.9163
	High	0	35.67	0.0194321	71.2127
	High	0	35.6	0.018894	60.5742
	High	0	35.26	0.0227112	63.4428
	High	0	35.17	0.0187166	60.2469
	Medium	0.2222	34.71	0.0286848	62.0563
	High	0.0278	34.71	0.0208586	54.8866
	High	0	34.67	0.0217681	76.1712
	High	0	34.66	0.0192363	43.9014
	High	0	34.44	0.00969524	39.8583
	High	0	34.33	0.0234116	72.5428
	High	0	34.18	0.021408	39.7105
	High	0	33.93	0.0190151	73.4855
	High	0	33.84	0.0264557	82.6638
	High	0	33.25	0.0185712	65.2887
	High	0	33.17	0.0157115	34.6347
	High	0	33.07	0.0282589	35.9377
	High	0	33.07	0.0222175	40.8147
	High	0	32.95	0.0164518	51.4336
	Medium	0	32.89	0.0300973	34.991
	High	0	32.6	0.024592	31.4732
	High	0	32.55	0.0246544	49.4027
	Medium	0	32.25	0.0350249	35.6808
	Medium	0	32.2	0.0432939	60.1627
	Medium	0	32.11	0.0448772	74.182
	Medium	0	31.91	0.028279	41.1132
	High	0	31.85	0.02348	79.2471
	Medium	0	31.48	0.048327	66.3024
	Medium	0	30.97	0.0404716	37.6993
	Medium	0	30.54	0.0428735	41.1112
	Medium	0	30.29	0.0408772	49.2681
	High	0	29.41	0.0258886	32.3327
	Medium	0	29.41	0.0532091	65.6394
	Medium	0	29.13	0.0379369	13.6073
	Medium	0	27.11	0.0558318	82.74
IPI00321308.4	Alanyl-tRNA synthetase, cytoplasmic	RNA binding; nucleotide binding; catalytic activity; metal ion binding	cytoplasm	development; metabolic process; regulation of biological process; cell communication; response to stimulus; cell death	106.841
	A2	ΔCn	IonScore	Exp Value	RT [min]
	High	0	76.5	9.6265e-07	87.7751
	High	0	60.72	4.56232e-05	98.7043
	High	0	50.79	0.000608587	82.2689
	High	0	48	0.000963615	60.1584
	High	0	40.12	0.00607967	42.0214
	High	0	34.1	0.0272332	115.854
	A2	ΔCn	IonScore	Exp Value	RT [min]
	High	0	97.84	1.1971e-08	73.314
	High	0	95.8	7.39105e-09	68.9219
	High	0	85.68	2.04419e-07	52.8345
	High	0	80.32	4.62625e-07	97.7435
	High	0	80.24	4.80215e-07	65.1242
	High	0	77.4	1.11912e-06	58.6691
	High	0	77.17	8.11597e-07	132.599
	High	0	76.33	5.68054e-07	49.9844
	High	0	74.66	1.98348e-06	104.554
	High	0	74.59	1.23549e-06	119.676
	High	0	72.95	3.19911e-06	71.2584
	High	0	72.85	2.594e-06	65.4142
	High	0	72.44	2.88503e-06	85.5671
	High	0	71.64	2.50203e-06	103.751
	High	0	71.05	4.34235e-06	91.5405
	High	0	69.96	6.2826e-06	78.253
	High	0	67.79	7.22753e-06	54.2233
	High	0	66.37	1.58128e-05	89.681
	High	0	66.08	1.00738e-05	62.3589
	High	0	65.72	9.84594e-06	90.9244
	High	0	65.42	1.78275e-05	107.195
	High	0	65.09	1.27304e-05	102.961
	High	0	64.75	1.48055e-05	97.2019
	High	0	63.98	2.97959e-05	44.1639
	High	0	63.66	2.11389e-05	76.411
	High	0	62.21	2.81049e-05	102.13
	High	0	61.37	5.60953e-05	90.2691
	High	0	61.06	6.15776e-05	56.4434
	High	0	60.68	5.17315e-05	128.655
	High	0	60.3	5.9355e-05	89.304
	High	0	59.81	7.37572e-05	64.7766
	High	0	58.57	0.000111544	69.5036
	High	0	58.26	0.000105466	43.2498
	High	0	56.58	0.000148026	33.7818
	High	0	56.21	0.000133427	50.3536
	High	0	56.05	0.000181889	61.2694
	High	0	55.02	0.000196577	98.196
	High	0	54.23	0.000265622	69.4376
	High	0	53.75	0.000247114	132.406
	High	0	53.39	0.000247626	52.7882
	High	0	52.87	0.000219735	125.497
	High	0	51.81	0.000277842	122.137
	High	0	51.59	0.000379304	23.6096
	High	0	51.5	0.000388308	10.8178
	High	0	48.95	0.000624653	46.2199
	High	0	48.74	0.000769211	76.0853
	High	0	47.86	0.000895339	27.0499
	High	0	46.57	0.000884475	109.044
	High	0	46.5	0.00161188	67.3963
	High	0	45.39	0.0021868	119.732
	High	0	45.37	0.00149848	85.615
	High	0	44.38	0.00268094	66.6268
	High	0	44.26	0.00233421	42.7529
	High	0	42.58	0.00299778	67.3414
	High	0	41.41	0.00449924	102.17
	High	0	40.84	0.00472643	66.9666
	High	0	40.71	0.00312498	23.861
	High	0	39.48	0.00825672	76.1108
	High	0	39.32	0.00367808	32.2583
	High	0	38.16	0.0136488	34.9011
	High	0	37.58	0.0122208	88.3697
	High	0	37.2	0.0115661	58.6006
	High	0	37.14	0.00902229	12.9195
	High	0	37	0.00679387	45.2041
	High	0	36.98	0.0143921	71.6932
	High	0	35.99	0.0107882	123.966
	High	0	35.83	0.0188206	55.7538
	High	0	35.48	0.0214195	66.7448
	High	0	34.03	0.0202032	120.219
	High	0	33.7	0.0091288	12.0825
	High	0	33.05	0.0209575	44.0668
	Medium	0	31.95	0.0424764	40.9545
	Medium	0	31.79	0.0336737	109.391
	High	0	31.7	0.024339	95.2028
	Medium	0	28.62	0.0528319	35.8238
	High	0	27.94	0.0100581	97.0024
	Medium	0	26.11	0.0506956	48.5303
	A2	ΔCn	IonScore	Exp Value	RT [min]
	High	0	121.51	3.45742e-11	72.4538
	High	0	106.54	1.02924e-09	80.189
	High	0	78.91	5.82235e-07	61.3344
	High	0	77.4	1.11912e-06	58.6691
	High	0	77.17	8.11597e-07	132.599
	High	0	77.1	8.69631e-07	55.3242
	High	0	74.66	1.98348e-06	104.554
	High	0	74.59	1.23549e-06	119.676
	High	0	74.25	2.8714e-06	50.4128
	High	0	71.71	5.15002e-06	60.5619
	High	0	71.64	2.50203e-06	103.751
	High	0	71.05	4.34235e-06	91.5405
	High	0	70.58	6.05926e-06	55.2222
	High	0	70.43	6.29031e-06	62.3477
	High	0	69.96	6.2826e-06	78.253
	High	0	69.73	5.6772e-06	59.1171
	High	0	66.06	1.61528e-05	61.326
	High	0	65.72	9.84594e-06	90.9244
	High	0	65.42	1.78275e-05	107.195
	High	0	64.91	2.34389e-05	63.6738
	High	0	64.75	1.48055e-05	97.2019
	High	0	64.25	2.48992e-05	77.7574
	High	0	64.02	2.30238e-05	60.7972
	High	0	63.98	2.97959e-05	44.1639
	High	0	63.01	3.04021e-05	55.1904
	High	0	62.21	2.81049e-05	102.13
	High	0	61.37	5.60953e-05	90.2691
	High	0	61.11	5.46383e-05	42.2897
	High	0	60.3	5.9355e-05	89.304
	High	0	59.81	7.37572e-05	64.7766
	High	0	58.57	0.000111544	69.5036
	High	0	56.58	0.000148026	33.7818
	High	0	56.55	0.000132896	14.8311
	High	0	56.4	0.000165859	56.2471
	High	0	56.21	9.31e-05	32.1622
	High	0	56.21	0.000133427	50.3536
	High	0	55.07	0.000197283	71.7735
	High	0	54.78	0.000215896	65.4183
	High	0	54.67	0.000204204	82.4279
	High	0	53.49	0.000250272	58.5235
	High	0	52.87	0.000219735	125.497
	High	0	52.69	0.000258908	45.7992
	High	0	52.53	0.000297385	56.5344
	High	0	51.59	0.000379304	23.6096
	High	0	51.04	0.000437597	36.1798
	High	0	50.84	0.000442562	79.2107
	High	0	49.82	0.000711382	92.6405
	High	0	49.49	0.000593791	52.8699
	High	0	48.13	0.00110978	68.423
	High	0	47.66	0.00104723	114.18
	High	0	46.57	0.000884475	109.044
	High	0	45.81	0.00103263	7.65629
	High	0	45.25	0.00158225	56.4017
	High	0	45.23	0.00200194	70.1557
	High	0	44.26	0.00233421	42.7529
	High	0	43.69	0.0029117	61.9846
	High	0	43.61	0.000335344	86.7774
	High	0	43.49	0.00299072	39.3832
	High	0	43.17	0.00381221	71.093
	High	0	41.85	0.00348119	54.3901
	High	0	39.51	0.00435461	20.3091
	High	0	39.33	0.00648163	54.3457
	High	0	39.08	0.00663086	57.3279
	High	0	38.94	0.00160831	23.3012
	High	0	38.41	0.00773695	64.8376
	High	0	38.26	0.0105093	48.4462
	High	0	37.14	0.00902229	12.9195
	High	0	37.02	0.0157199	22.4242
	High	0	36.98	0.0143921	71.6932
	High	0	36.51	0.00828655	18.1458
	High	0	36.25	0.00212238	78.0947
	High	0	35.52	0.019638	81.9566
	High	0	35.42	0.0196792	60.9542
	High	0	35.33	0.0203551	118.009
	High	0	35.16	0.0190036	58.0436
	High	0	34.98	0.0115003	49.2462
	High	0	34.36	0.0235986	65.9353
	High	0	33.7	0.0091288	12.0825
	High	0	33.4	0.0230144	109.76
	High	0	33.24	0.0296401	98.2122
	High	0	33.13	0.0230071	70.7615
	High	0	33.05	0.0209575	44.0668
	Medium	0	32.6	0.0326427	27.132
	Medium	0	32.22	0.0384166	45.0843
	Medium	0	31.79	0.0336737	109.391
	High	0	31.25	0.0262838	9.49889
	Medium	0	30.49	0.0323823	13.9275
	Medium	0	29.02	0.0567046	59.2653
	Medium	0	28.26	0.0580697	45.3487
	High	0	28.17	0.0135641	29.7712
	A2	ΔCn	IonScore	Exp Value	RT [min]
	High	0	92.43	3.20314e-08	61.9888
	High	0	64.49	2.86994e-05	101.726
	High	0	55.71	1.68079e-05	96.5281
	High	0	45.65	0.000528204	75.1115
	A2	ΔCn	IonScore	Exp Value	RT [min]
	High	0	83.42	3.05297e-07	59.2798
	High	0	70.8	3.10248e-06	70.9336
	High	0	59.86	7.24999e-05	63.676
	High	0	56.47	0.000102681	111.299
	High	0	56.13	0.000115308	23.1151
	High	0	56.12	0.000188877	56.8047
	High	0	51.65	0.000277326	44.9461
	High	0	51.59	0.000299907	61.1347
	High	0	50.33	0.000357756	50.8973
	High	0	49.77	0.000360073	17.0889
	High	0	49.05	0.000966366	39.5808
	High	0	47.83	0.000994666	69.417
	High	0	46.96	0.00119212	48.0075
	High	0	46.35	0.00157583	24.3721
	High	0	41.7	0.00467849	52.6477
	High	0	41.45	0.00356281	31.5144
	High	0	39.76	0.00935283	26.1085
	High	0	38.98	0.00555219	38.1904
	High	0	38.79	0.00896499	35.1432
	High	0	38.32	0.00951114	57.33
	High	0	38.18	0.00837822	61.8946
	High	0	37.71	0.0107506	54.8599
	High	0	37.63	0.0105017	28.5848
	High	0	36.53	0.0100049	55.0959
	High	0	35.44	0.0163597	39.7719
	High	0	34.62	0.0110964	12.0903
	Medium	0	32.49	0.0459928	41.5484
	Medium	0	32.13	0.0385781	59.7247
	High	0	31.09	0.0297988	31.0182
	Medium	0	24.5	0.0463031	18.2422
	A2	ΔCn	IonScore	Exp Value	RT [min]
	High	0	55.95	0.000174184	98.6004
	High	0	47.62	0.00121606	71.15
	Medium	0	27.24	0.0426686	104.224
	A2	ΔCn	IonScore	Exp Value	RT [min]
	High	0	35.71	0.0127017	74.5468
	A2	ΔCn	IonScore	Exp Value	RT [min]
	High	0	42.57	0.00192012	77.9695
IPI00605902.4	Ataxin-1-like	DNA binding; RNA binding; protein binding	nucleus	metabolic process; regulation of biological process	73.3287
	A2	ΔCn	IonScore	Exp Value	RT [min]
	High	0	44.81	0.00254219	37.9606
	A2	ΔCn	IonScore	Exp Value	RT [min]
	High	0	37.9	0.012123	95.2262
IPI00396671.1	ATP-binding cassette sub-family F member 1	nucleotide binding; translation regulator activity; catalytic activity	nucleus; organelle lumen; cytoplasm; ribosome	metabolic process; regulation of biological process	94.8869
	A2	ΔCn	IonScore	Exp Value	RT [min]
	High	0	79.9	4.10852e-07	51.1245
	High	0	33.58	0.00274482	85.2507
	A2	ΔCn	IonScore	Exp Value	RT [min]
	High	0	49.68	0.000553303	115.425
	High	0	46.19	0.000406337	82.5402
	High	0	35.31	0.00924548	92.9189
	A2	ΔCn	IonScore	Exp Value	RT [min]
	High	0	43.56	0.00106174	56.5097
	Medium	0	28.11	0.0551656	104.645
	A2	ΔCn	IonScore	Exp Value	RT [min]
	High	0	76.79	3.70658e-07	53.3993
	High	0	63.51	1.21887e-05	120.635
	High	0	61.15	2.6474e-05	100.075
	High	0	55.51	0.000132862	102.095
	High	0	53.89	0.000275003	81.2076
	High	0	52.92	0.000421422	18.584
	High	0	49.28	0.000192982	106.468
	High	0	47.13	0.00123447	51.6336
	High	0	45.96	0.00173023	80.2464
	High	0	44.44	0.00269272	118.321
	High	0	43.9	0.00100012	38.7908
	High	0	40.3	0.0059075	50.9421
	High	0	37.8	0.00565919	29.7329
	High	0	35.44	0.00178861	26.2902
	High	0	33.86	0.0139996	69.7671
	High	0	32.04	0.0258821	53.0429
	A2	ΔCn	IonScore	Exp Value	RT [min]
	High	0	61.86	4.62656e-05	97.1739
	High	0	61.15	2.6474e-05	100.075
	High	0	56.12	7.51355e-05	117.862
	High	0	55.51	0.000132862	102.095
	High	0	53.89	0.000275003	81.2076
	High	0	52.92	0.000421422	18.584
	High	0	49.28	0.000192982	106.468
	High	0	45.96	0.00173023	80.2464
	High	0	44.44	0.00269272	118.321
	High	0	40.3	0.0059075	50.9421
	High	0	37.8	0.00565919	29.7329
	High	0	35.44	0.00178861	26.2902
	High	0	32.04	0.0258821	53.0429
	Medium	0	29.91	0.0302709	17.5703
IPI00331334.4	BAG family molecular chaperone regulator 3	protein binding	cytoplasm; cytosol; membrane	cell death; development; regulation of biological process	61.8222
	A2	ΔCn	IonScore	Exp Value	RT [min]
	High	0	34.3	0.0222364	27.2242
IPI00396779.6	BAH and coiled-coil domain-containing protein 1	DNA binding			282.345
	A2	ΔCn	IonScore	Exp Value	RT [min]
	High	0	41.33	0.00452767	13.2799
	A2	ΔCn	IonScore	Exp Value	RT [min]
	High	0	73.85	1.85444e-06	20.4953
	High	0	45.68	0.000709789	80.393
	High	0	44.01	0.00184893	33.2785
	High	0	33.77	0.0187632	27.7818
	High	0	33.62	0.0150123	31.3713
	Medium	0	31.42	0.0491795	46.2535
IPI00753321.2	biorientation of chromosomes in cell division 1-like	DNA binding			327.255
	A2	ΔCn	IonScore	Exp Value	RT [min]
	High	0	70.73	3.07259e-06	17.7566
	High	0	68.14	1.15557e-05	54.6378
	High	0	65.06	1.82299e-05	45.6164
	High	0	61.83	4.59302e-05	26.7393
	High	0	55.95	0.000147122	43.3884
	High	0	55.2	7.53478e-05	16.9043
	High	0	53.02	0.000231981	12.1224
	High	0	52.35	0.000121951	29.7691
	High	0	51.25	0.000521176	40.2171
	High	0	49.65	0.000832456	41.3081
	High	0	44.7	0.00205678	37.0235
	High	0	43.39	0.00136984	34.588
	High	0	42.25	0.00419942	37.134
	High	0	41.98	0.000396748	29.767
	High	0	41.97	0.00422495	52.6609
	High	0	39.79	0.0072156	40.6516
	High	0	37.7	0.00669108	27.6425
	High	0	37.41	0.0102758	61.976
	High	0	33.86	0.0199819	12.5358
	Medium	0	32.12	0.0378384	45.1118
	High	0	31.69	0.0261908	73.9294
	Medium	0	31.58	0.0331527	27.3799
	Medium	0	31.4	0.0527027	13.0741
	High	0	31.13	0.020082	26.4482
	Medium	0	31.11	0.041395	50.0323
IPI00653274.1	Brain cDNA, clone MNCb-1272, similar to Mus musculus chaperonin subunit 2 (beta) (Cct2), mRNA	nucleotide binding; protein binding	nucleus; cytoplasm; cytosol; cytoskeleton	metabolic process; reproduction; cell organization and biogenesis	52.4356
	A2	ΔCn	IonScore	Exp Value	RT [min]
	High	0	77.34	3.67158e-07	97.0437
	High	0	34.36	0.0120924	102.145
IPI00122862.5	C-1-tetrahydrofolate synthase, cytoplasmic	nucleotide binding; catalytic activity	cytoplasm; mitochondrion	metabolic process	101.136
	A2	ΔCn	IonScore	Exp Value	RT [min]
	High	0	46.12	0.00113131	66.4575
	High	0	36.8	0.00718718	73.7564
	Medium	0	33.42	0.0340786	76.3886
IPI00308162.3	Calcium-binding mitochondrial carrier protein Aralar1	transporter activity; metal ion binding	cytoplasm; mitochondrion; membrane	transport; metabolic process; response to stimulus	74.5227
	A2	ΔCn	IonScore	Exp Value	RT [min]
	High	0	43.45	0.000903712	121.106
	A2	ΔCn	IonScore	Exp Value	RT [min]
	High	0	107.22	2.74074e-10	19.9075
	High	0	79.48	7.05528e-08	18.4275
	High	0	75.88	1.73528e-06	17.4719
	High	0	73.22	3.17779e-06	60.4367
	High	0	71.94	6.2694e-07	16.8998
	High	0	67.78	1.06037e-05	28.4373
	High	0	67.08	1.2615e-05	60.9456
	High	0	65.81	1.45644e-05	37.1631
	High	0	62.94	2.68054e-05	80.4305
	High	0	60.17	8.10639e-05	24.6697
	High	0	59.23	7.76092e-05	64.5744
	High	0	58.87	7.78308e-05	22.3437
	High	0	55.9	7.47985e-05	17.2396
	High	0	54.21	0.000234037	62.8458
	High	0	53.78	0.00031242	44.4429
	High	0	51.18	0.000561652	14.2741
	High	0	50.65	0.000554049	49.354
	High	0	49.73	0.000761394	45.7179
	High	0	48.81	0.000833195	41.9682
	High	0	48.68	0.000665398	19.7831
	High	0	48.06	0.000863639	24.2592
	High	0	47.38	0.000961581	20.4375
	High	0	45.97	0.00169084	21.2812
	High	0	45.33	0.00143467	51.8719
	High	0	45.3	0.000942911	11.0287
	High	0	45.04	0.00230297	50.7698
	High	0	44.44	0.0030075	28.6169
	High	0	43.96	0.00285673	53.6843
	High	0	42.78	0.00176358	23.1499
	High	0	42.55	0.00286013	20.3051
	High	0	42.31	0.00355725	63.17
	High	0	41.58	0.0014109	12.9884
	High	0	41.06	0.00621651	42.4489
	High	0	39.59	0.00710507	20.6162
	High	0	39.21	0.00494194	7.75316
	High	0	36.34	0.00149817	16.8051
	High	0	36.32	0.00905382	53.5409
	High	0	35.63	0.00171204	12.9928
	High	0	35.31	0.0211704	59.3993
	High	0	34.84	0.0246892	18.651
	High	0	33.75	0.0259765	47.196
	High	0	33.74	0.0265013	25.1214
	Medium	0	33.35	0.0316962	30.0705
	High	0	33.05	0.00706017	14.3402
	Medium	0	32.75	0.0364187	38.861
	Medium	0	30.94	0.0428864	18.3429
	Medium	0	30.83	0.0313894	16.7885
	Medium	0	30.59	0.0414661	39.1317
	A2	ΔCn	IonScore	Exp Value	RT [min]
	High	0	38.89	0.00745679	112.421
	A2	ΔCn	IonScore	Exp Value	RT [min]
	High	0	55.38	0.000157905	75.3181
	High	0	51.22	0.000346965	66.9603
	Medium	0	30.15	0.049172	73.9033
	A2	ΔCn	IonScore	Exp Value	RT [min]
	High	0	45.96	0.00158826	111.998
	High	0	33.45	0.0213276	104.291
	Medium	0	30.24	0.0490624	15.6103
IPI00132758.4	Calpain-6	catalytic activity; protein binding	cytoplasm; cytoskeleton	cell organization and biogenesis; metabolic process; regulation of biological process	74.4947
	A2	ΔCn	IonScore	Exp Value	RT [min]
	High	0	32.62	0.0261474	101.065
	A2	ΔCn	IonScore	Exp Value	RT [min]
	High	0	64.95	1.71621e-05	94.7781
	High	0	62.29	3.90123e-05	78.5603
	High	0	50.23	0.000722695	37.3217
	High	0	47.73	0.000947843	117.409
	High	0	42.56	0.00363834	51.8523
	High	0	37.26	0.00775218	20.1532
	High	0	32.38	0.0072262	32.9566
	A2	ΔCn	IonScore	Exp Value	RT [min]
	High	0	87.63	1.10022e-07	45.2805
	High	0	70.14	1.9656e-06	92.7883
	High	0	64.54	2.17089e-05	124.028
	High	0	51.67	0.000417652	42.0954
	High	0	42.3	0.00433389	42.8317
	High	0	37.56	0.0111898	71.9958
IPI01007736.1	CCR4-NOT transcription complex subunit 1 isoform 1	protein binding	cytoplasm; membrane	metabolic process; regulation of biological process	260.791
	A2	ΔCn	IonScore	Exp Value	RT [min]
	High	0	52.51	0.000371414	72.9414
	High	0	42.48	0.00256481	97.1397
	A2	ΔCn	IonScore	Exp Value	RT [min]
	High	0	91.94	4.38858e-08	111.216
	High	0	76.88	4.63563e-07	119.429
	High	0	74.17	4.74703e-07	122.966
	High	0	63.8	2.94101e-05	76.4607
	High	0	60.87	3.63808e-05	71.3873
	High	0	54.5	0.000208985	71.916
	High	0	49.21	0.000926613	67.0063
	High	0	45.93	0.00154949	80.3393
	High	0	44.51	0.002524	53.688
	High	0	43.16	0.0022583	53.1146
	High	0	40.07	0.00466421	63.829
	High	0	37.85	0.00679204	111.955
IPI00989599.1	cDNA fis, clone TRACH3010757, highly similar to Interferon-gamma inducible protein MG11	RNA binding; catalytic activity; metal ion binding	nucleus	defense response; response to stimulus; regulation of biological process	47.1841
	A2	ΔCn	IonScore	Exp Value	RT [min]
	High	0	43.42	0.00182223	109.809
IPI00284444.5	Cell division cycle 5-related protein	DNA binding; RNA binding; protein binding	nucleus; spliceosomal complex; organelle lumen; cytoplasm	metabolic process; regulation of biological process	92.1325
	A2	ΔCn	IonScore	Exp Value	RT [min]
	High	0	46.73	0.000132897	67.4362
IPI00109419.2	Chromosome-associated kinesin KIF4	nucleotide binding; DNA binding; catalytic activity; motor activity; metal ion binding	nucleus; chromosome; cytoplasm; cytosol; cytoskeleton	cellular component movement; cell organization and biogenesis; metabolic process	139.432
	A2	ΔCn	IonScore	Exp Value	RT [min]
	Medium	0	33.8	0.0318071	71.148
	A2	ΔCn	IonScore	Exp Value	RT [min]
	High	0	97.47	1.05109e-08	76.0698
	High	0	79.14	8.72797e-07	91.0603
	High	0	72.68	3.07521e-06	63.771
	High	0	67.98	9.92742e-06	96.2322
	High	0	67.61	1.22233e-05	52.9857
	High	0	66.24	1.14564e-05	111.66
	High	0	64.78	2.40679e-05	41.8784
	High	0	62.15	3.27321e-05	97.5884
	High	0	61.11	4.27116e-05	21.0995
	High	0	58.78	7.03888e-05	103.082
	High	0	51.9	0.000447761	19.1924
	High	0	48.89	0.000992302	49.7393
	High	0	48.14	0.000664489	78.1313
	High	0	47.93	0.00109685	43.1276
	High	0	46.96	0.000641371	94.9813
	High	0	46.83	0.000678497	88.3337
	High	0	46.12	0.00178126	50.8264
	High	0	44.58	0.00142296	87.6603
	High	0	42.37	0.00438917	56.2803
	High	0	42.19	0.00256376	74.1366
	High	0	40.28	0.00681608	55.8259
	High	0	38.64	0.00952623	106.94
	High	0	37.56	0.0125402	121.501
	High	0	37.55	0.00715475	95.8406
	High	0	36.49	0.0106921	18.5914
	High	0	33.82	0.0150421	32.604
	High	0	32.61	0.00934812	89.0565
	High	0	32.13	0.0309237	85.1821
	Medium	0	31.75	0.0284715	14.3025
	Medium	0	29.58	0.0451631	61.341
	High	0	23.5	0.0279585	52.2914
	Medium	0	22.85	0.0464326	82.7542
	Medium	0.0833	22.42	0.0406685	71.5735
	A2	ΔCn	IonScore	Exp Value	RT [min]
	High	0	102.94	2.54842e-09	132.313
	A2	ΔCn	IonScore	Exp Value	RT [min]
	High	0	45.19	0.00222932	93.838
	High	0	38.74	0.00892846	94.628
IPI00313558.5	Coatomer subunit delta	protein binding	cytoplasm; Golgi; membrane	transport	57.1932
	A2	ΔCn	IonScore	Exp Value	RT [min]
	High	0	50.25	0.000680668	87.5476
	A2	ΔCn	IonScore	Exp Value	RT [min]
	High	0	44.5	0.00235773	115.183
	High	0	39.38	0.000721962	93.2517
	Medium	0	33.3	0.035314	117.342
	A2	ΔCn	IonScore	Exp Value	RT [min]
	High	0	74.56	2.38313e-06	86.3951
	High	0	54.65	0.00026993	57.3718
	High	0	51.74	0.000162112	66.3564
	High	0	36.58	0.0089343	97.879
	High	0	35.05	0.0200538	47.1118
	High	0	34.44	0.0176997	51.8997
	Medium	0	29.57	0.0497939	94.0634
IPI00938510.1	cold shock domain-containing protein E1 isoform 2	DNA binding; RNA binding	cytoplasm; membrane; mitochondrion	metabolic process; regulation of biological process	85.5993
	A2	ΔCn	IonScore	Exp Value	RT [min]
	High	0	65.16	2.16553e-05	81.757
	Medium	0	31.87	0.0455741	64.9701
IPI00830478.1	Constitutive coactivator of PPAR-gamma-like protein 1	RNA binding	cytoplasm; membrane		121.569
	A2	ΔCn	IonScore	Exp Value	RT [min]
	High	0	77.99	3.5504e-07	22.1383
	High	0	77.77	9.82601e-07	26.679
	High	0	58.2	8.72568e-05	30.2365
	High	0	53.12	0.00028301	73.9651
	High	0	52.7	0.000420496	93.8454
	High	0	49.74	0.000685855	55.0724
	High	0	36.82	0.00999294	11.4451
	High	0	35.45	0.0173484	40.345
	A2	ΔCn	IonScore	Exp Value	RT [min]
	High	0	39.73	0.00748625	58.3142
	High	0	35.55	0.00466675	119.136
	Medium	0	30.43	0.0392182	40.1791
	A2	ΔCn	IonScore	Exp Value	RT [min]
	High	0	92.24	1.01795e-08	109.972
	High	0	46.59	0.000154593	91.0392
	High	0	34.92	0.0213396	74.7143
	High	0	22.04	0.0391304	114.828
IPI00123891.3	Cysteine and glycine-rich protein 1	protein binding; metal ion binding	nucleus; cytoskeleton	cell organization and biogenesis	20.5698
	A2	ΔCn	IonScore	Exp Value	RT [min]
	High	0	43.69	0.00253972	65.2507
	A2	ΔCn	IonScore	Exp Value	RT [min]
	High	0	118.86	6.22781e-11	108.497
	High	0	115.02	2.12473e-10	93.9816
	High	0	94.86	2.18487e-08	70.8281
	High	0	81.04	5.07251e-07	108.745
	High	0	78.25	8.2667e-07	81.32
	High	0	73.99	2.56972e-06	117.721
	High	0	70.42	4.23498e-06	107.784
	High	0	69.61	2.76771e-06	51.9564
	High	0	67.18	3.3978e-06	73.2818
	High	0	67.15	9.59907e-06	71.607
	High	0	65.8	1.06526e-05	65.3729
	High	0	65.25	2.22262e-05	32.8534
	High	0	61.64	6.10085e-06	105.2
	High	0	60.6	3.10499e-05	92.1748
	High	0	59.73	4.7514e-05	104.722
	High	0	57.97	9.86253e-05	83.5241
	High	0	56.69	0.000121609	76.9772
	High	0	53.92	0.000189575	96.8627
	High	0	53.73	0.000216693	98.4024
	High	0	49.98	0.000647475	42.7633
	High	0	48.78	0.000705212	66.5698
	High	0	47.43	0.00132737	78.727
	High	0	46.57	0.00169846	39.9094
	High	0	45.45	0.00121026	28.6333
	High	0	45.34	0.00208638	41.7093
	High	0	44.9	0.00210336	84.8745
	High	0	44.07	0.00177851	108.731
	High	0	43.88	0.000697789	60.3205
	High	0	43.65	0.00266895	78.1718
	High	0	43.65	0.00265816	109.755
	High	0	43.35	0.00271649	51.6271
	High	0	43.27	0.00263512	58.0215
	High	0	43.05	0.0038001	55.5682
	High	0	42.77	0.0011573	50.8198
	High	0	42.74	0.00305164	21.379
	High	0	41.47	0.0042985	44.8782
	High	0	40.91	0.0046833	91.2779
	High	0	40.24	0.00340645	48.3552
	High	0	39.66	0.00668326	69.9883
	High	0	39.44	0.00713292	108.943
	High	0	38.59	0.00510536	66.2491
	High	0	37.36	0.00494947	43.7259
	High	0	36.92	0.0121738	87.2721
	High	0	36.77	0.00591162	14.9619
	High	0	36.3	0.00464157	75.446
	High	0	34.96	0.0186226	54.7008
	High	0	34.94	0.00687745	92.0547
	High	0	34.4	0.027721	40.7598
	High	0	33.99	0.0254977	48.0757
	Medium	0	33.8	0.0349962	38.8998
	High	0	33.24	0.017547	30.132
	High	0	32.59	0.0131368	97.6717
	High	0	32.24	0.0126571	91.6794
	Medium	0	32.12	0.039649	41.7158
	High	0	32.12	0.00384162	43.2481
	Medium	0	32.02	0.0450632	89.4805
	Medium	0	31.21	0.0459398	44.6251
	Medium	0	31.1	0.0543761	78.7036
	Medium	0	30.28	0.0533942	124.236
	Medium	0	29.65	0.0315965	98.0708
	Medium	0	29.32	0.0492944	41.2214
	Medium	0	28.61	0.0357386	97.9393
	Medium	0	28.25	0.0452611	35.2492
	High	0	27.73	0.0145887	105.406
	Medium	0	19.48	0.0705528	31.5444
	A2	ΔCn	IonScore	Exp Value	RT [min]
	High	0	63.61	2.99414e-05	114.155
	A2	ΔCn	IonScore	Exp Value	RT [min]
	High	0	111.4	4.96239e-10	61.9803
	High	0	70.39	3.44621e-06	52.0873
	High	0	59.94	6.32174e-05	43.2089
	High	0	58.2	8.14296e-05	54.3212
	High	0	53.48	0.000243669	104.496
	High	0	44.76	0.0025733	38.057
	High	0	38.62	0.00840227	27.9986
	Medium	0	30.2	0.0509489	48.6536
	A2	ΔCn	IonScore	Exp Value	RT [min]
	High	0	87.03	1.35437e-07	67.9684
	High	0	79.24	8.68415e-07	41.5551
	High	0	77.75	6.47179e-07	111.899
	High	0	69.13	8.67478e-06	62.9594
	High	0	68.89	8.7932e-06	50.9941
	High	0	67.87	9.55335e-06	64.0382
	High	0	67	9.05849e-06	51.1711
	High	0	62.81	2.43474e-05	7.53059
	High	0	59.01	9.06226e-05	66.5047
	High	0	55.41	0.000180125	55.8156
	High	0	49.93	0.000679362	33.4044
	High	0	49.88	0.000361348	105.531
	High	0	47.63	0.000693787	53.2034
	High	0	43.71	0.00222162	27.969
	High	0	43.33	0.00126813	27.8396
	High	0	43.26	0.0030212	79.1185
	High	0	42.11	0.00408477	14.1683
	High	0	41.83	0.00385813	63.5057
	High	0	40.67	0.00332102	43.7811
	High	0	39.14	0.00561345	68.4975
	High	0	38.83	0.00821512	7.15398
	High	0	38.72	0.00648555	73.9736
	High	0	37.25	0.00684706	104.508
	High	0	36.99	0.00453969	22.8225
	High	0	34.94	0.00840043	93.3347
	High	0	34.11	0.00906331	98.0182
	Medium	0	32.65	0.0397388	46.026
	High	0	32.55	0.0146759	36.4508
	High	0	31.46	0.0276153	57.6837
	High	0	30.85	0.023105	39.4604
	Medium	0	30.24	0.053557	19.8298
	Medium	0	30.09	0.0445178	118.718
	A2	ΔCn	IonScore	Exp Value	RT [min]
	High	0	68.19	1.12034e-05	112.399
	High	0	68.14	1.01822e-05	75.6212
	High	0	51.69	0.000500777	32.5654
	High	0	46.97	0.00123258	66.907
	High	0	46.84	0.000646919	66.1033
	High	0	44.37	0.00201077	22.6397
	High	0	43.51	0.00256921	37.1279
	High	0	43.51	0.00355411	83.8021
	High	0	37.94	0.0037281	98.2409
	High	0	35.28	0.020487	68.8695
	High	0	35.07	0.019775	87.8027
	High	0	34.5	0.00262562	43.3259
	High	0	34.24	0.0164431	31.9709
	Medium	0	32.87	0.0352196	45.8634
	Medium	0	31.45	0.0427896	92.1073
	High	0	29.04	0.0291888	76.5473
	Medium	0	28.5	0.0559365	40.6478
IPI00225616.3	DENN domain-containing protein 2A	enzyme regulator activity	cytoskeleton	transport	113.024
	A2	ΔCn	IonScore	Exp Value	RT [min]
	High	0	55.75	9.15289e-05	115.571
	High	0	39.46	0.00229311	93.5355
	A2	ΔCn	IonScore	Exp Value	RT [min]
	High	0	73.73	2.87018e-06	32.5716
	High	0	62.48	3.94608e-05	57.767
	High	0	45.12	0.00185335	50.5466
	High	0	44.86	0.00244614	60.8419
	High	0	43.28	0.00116299	59.1019
	High	0	32.91	0.0134316	46.1414
	High	0	31.84	0.0222576	52.4077
	Medium	0	31.34	0.0348527	110.768
IPI00421139.9	discs large homolog 5 isoform 2	catalytic activity; motor activity; protein binding	cytoplasm; cytoskeleton; membrane	cell organization and biogenesis; cell death; regulation of biological process	211.965
	A2	ΔCn	IonScore	Exp Value	RT [min]
	High	0	63.84	2.58532e-06	103.525
	High	0	38.03	0.00518627	59.9189
IPI00109459.1	DNA (cytosine-5)-methyltransferase 3-like	protein binding; enzyme regulator activity; catalytic activity; metal ion binding	chromosome; nucleus; organelle lumen; cytoplasm; cytosol	development; metabolic process; regulation of biological process; cell differentiation	47.9616
	A2	ΔCn	IonScore	Exp Value	RT [min]
	High	0	32.53	0.00793028	45.9432
IPI00316740.4	DNA damage-binding protein 1	DNA binding; protein binding	nucleus; cytoplasm	regulation of biological process; metabolic process; response to stimulus; cell communication	126.772
	A2	ΔCn	IonScore	Exp Value	RT [min]
	High	0	44.29	0.00250061	42.2716
	High	0	39.73	0.00675731	53.2442
	High	0	35.83	0.0199177	47.0077
	Medium	0	29.56	0.0438776	101.492
IPI00118158.1	DNA mismatch repair protein Msh2	nucleotide binding; metal ion binding; DNA binding; protein binding; catalytic activity	chromosome; nucleus; organelle lumen	metabolic process; reproduction; response to stimulus; development; cell death; regulation of biological process; cell differentiation; cell communication; cell organization and biogenesis	104.085
	A2	ΔCn	IonScore	Exp Value	RT [min]
	High	0	100.7	6.50269e-09	102.812
	High	0	51.86	0.000466566	52.0062
IPI00323790.2	DNA mismatch repair protein Msh6	nucleotide binding; metal ion binding; DNA binding; catalytic activity; protein binding	chromosome; nucleus; organelle lumen	metabolic process; reproduction; response to stimulus; development; cell communication; cell death; regulation of biological process; cell organization and biogenesis	150.989
	A2	ΔCn	IonScore	Exp Value	RT [min]
	High	0	82.16	1.6967e-07	55.4207
IPI00108338.1	DNA replication licensing factor MCM3	nucleotide binding; DNA binding; catalytic activity	nucleus; cytoplasm; cytoskeleton	metabolic process	91.4892
	A2	ΔCn	IonScore	Exp Value	RT [min]
	High	0	59.11	8.54298e-05	117.623
	High	0	50.58	0.000249808	90.1056
	High	0	40.36	0.00242078	82.8381
	High	0	34.8	0.0101161	81.3332
IPI00117016.1	DNA replication licensing factor MCM4	nucleotide binding; DNA binding; catalytic activity; protein binding	nucleus	metabolic process	96.6756
	A2	ΔCn	IonScore	Exp Value	RT [min]
	High	0	49.31	0.000271363	87.3329
	A2	ΔCn	IonScore	Exp Value	RT [min]
	High	0	44.17	0.00296689	79.3058
	High	0	43.45	0.00304777	70.8984
	High	0	35.29	0.00294322	64.3305
	A2	ΔCn	IonScore	Exp Value	RT [min]
	High	0	49.6	0.000550432	53.4923
	High	0	35.77	0.0152818	73.1657
	High	0	33.31	0.00776988	33.3529
	Medium	0	32.86	0.0286237	23.1765
	High	0	31.52	0.0205418	70.417
IPI00625592.2	DNA-directed RNA polymerase	DNA binding; catalytic activity; protein binding; metal ion binding	nucleus; organelle lumen	metabolic process	216.625
	A2	ΔCn	IonScore	Exp Value	RT [min]
	High	0	50.23	0.000374151	85.7074
	High	0	48.76	0.000538834	111.175
	Medium	0	31.98	0.0300771	71.8397
IPI00320034.6	DNA-directed RNA polymerase II subunit RPB2	DNA binding; catalytic activity; metal ion binding	nucleus; organelle lumen	metabolic process	133.825
	A2	ΔCn	IonScore	Exp Value	RT [min]
	High	0	58.69	7.56485e-05	31.9398
	High	0	55.26	4.69116e-05	128.964
	High	0	37.57	0.0101666	57.3869
IPI00309035.2	Dolichyl-diphosphooligosaccharide--protein glycosyltransferase subunit 1	catalytic activity	cytoplasm; endoplasmic reticulum; membrane	metabolic process	68.4857
	A2	ΔCn	IonScore	Exp Value	RT [min]
	High	0	38.87	0.0080944	96.3882
	High	0	38.09	0.00828975	40.4559
IPI00956958.1	drebrin isoform 2	protein binding	cytoplasm; membrane; cytoskeleton	cell organization and biogenesis; development; cell communication; cell differentiation	72.5
	A2	ΔCn	IonScore	Exp Value	RT [min]
	High	0	78.11	1.19834e-06	49.366
	High	0	70.71	6.46226e-06	85.9786
	High	0	65.4	1.68427e-05	48.6761
	High	0	62.16	3.99849e-05	106.646
	High	0	56.13	0.000173085	30.7515
	High	0	49.68	0.000796046	33.7839
	High	0	47.97	0.0010437	11.9496
	High	0	44.67	0.00139718	7.39883
	High	0	43.31	0.00274396	28.661
	High	0	43.13	0.00327109	57.5781
	High	0	42.07	0.00142179	24.962
	High	0	40.5	0.00453647	30.9125
	High	0	40.03	0.00727954	67.3349
	High	0	35.43	0.00910809	42.7069
	High	0	35.33	0.00782548	10.5194
	Medium	0	30.72	0.0462163	10.2691
	High	0	30.42	0.0106669	88.6121
	High	0	26.41	0.0154278	66.1163
	A2	ΔCn	IonScore	Exp Value	RT [min]
	High	0	53.1	0.000316642	78.5991
	High	0	45.5	0.00130773	85.942
	High	0	41.52	0.00259679	53.6862
	High	0	41.14	0.00282655	15.7812
	High	0	40.18	0.00642319	67.321
	High	0	38.21	0.00212166	43.2199
	High	0	36.26	0.0171174	100.393
	High	0	35.51	0.0164637	32.4205
	High	0	35.39	0.0199457	61.2538
	High	0	33.43	0.0288026	73.1489
	High	0	32.62	0.0155353	14.0564
	High	0	31.77	0.0196921	29.5745
	Medium	0	28.7	0.0516653	34.4011
IPI00876390.2	E3 ubiquitin-protein ligase UBR5 isoform 2	RNA binding; catalytic activity; metal ion binding; protein binding	nucleus; cytoplasm	metabolic process; response to stimulus; regulation of biological process; transport; cell communication; cell organization and biogenesis	308.126
	A2	ΔCn	IonScore	Exp Value	RT [min]
	High	0	85.1	2.31772e-07	79.1799
	High	0	53.6	0.00028439	108.15
	High	0	50.14	0.000491885	80.321
	High	0	43.74	0.000302208	126.237
	High	0	41.38	0.00477424	67.2666
	A2	ΔCn	IonScore	Exp Value	RT [min]
	High	0	75.47	1.97661e-06	120.646
	High	0	56.89	9.64899e-05	66.385
	High	0	40.64	0.00238614	30.4184
	High	0	35.26	0.00950147	33.3925
IPI00402968.1	EH domain-containing protein 2	nucleotide binding; catalytic activity; metal ion binding; protein binding	cytoplasm; endosome; membrane	metabolic process; transport; cell organization and biogenesis	61.1358
	A2	ΔCn	IonScore	Exp Value	RT [min]
	High	0	37.19	0.0131207	105.032
	A2	ΔCn	IonScore	Exp Value	RT [min]
	High	0	42.76	0.00291845	41.2602
	Medium	0	32.31	0.0336338	68.7187
	A2	ΔCn	IonScore	Exp Value	RT [min]
	High	0	84.94	1.87887e-07	57.6316
	High	0	76.13	1.57117e-06	86.5305
	High	0	65.26	1.86455e-05	55.0194
	High	0	62.24	4.76434e-05	98.4326
	High	0	53.67	0.000295736	86.9656
	High	0	52.99	0.000285331	101.644
	High	0	50.86	0.000439298	19.9494
	High	0	48.38	0.000957668	58.1241
	High	0	46.43	0.00151521	107.571
	High	0	44.84	0.00154861	95.9342
	High	0	43.49	0.000559642	103.945
	High	0	39.73	0.00704995	45.5494
	High	0	38.8	0.00532576	120.735
	High	0	35.84	0.00548595	114.273
	High	0	35.74	0.0146277	103.808
	High	0	34.7	0.0236513	52.6108
	Medium	0	32.41	0.0390973	113.699
	Medium	0	32.09	0.0342999	19.3119
	High	0	30.95	0.00735226	20.3579
	Medium	0	30.56	0.0533567	15.4471
	Medium	0	28.52	0.0352918	33.9994
	Medium	0	28.38	0.0367384	20.6019
	A2	ΔCn	IonScore	Exp Value	RT [min]
	High	0	70.16	6.15405e-06	60.5765
	High	0	64.56	2.51611e-05	62.7355
	High	0	55.04	0.000231236	48.7113
	High	0	52.11	0.00028698	53.1034
	High	0	51.63	0.000486101	24.7019
	High	0	25.97	0.0231431	55.9022
	A2	ΔCn	IonScore	Exp Value	RT [min]
	High	0	44.72	0.00205745	108.524
	A2	ΔCn	IonScore	Exp Value	RT [min]
	High	0	48.68	0.000984545	120.89
	High	0	37.84	0.00892894	64.0742
	High	0	35.19	0.016754	14.2129
	High	0	30.87	0.019193	73.1978
	A2	ΔCn	IonScore	Exp Value	RT [min]
	High	0	56.04	4.16884e-05	24.3429
	High	0	44.29	0.00237958	74.4817
	A2	ΔCn	IonScore	Exp Value	RT [min]
	High	0	56.67	0.00012217	59.4972
	High	0	40.71	0.00556213	72.7779
	A2	ΔCn	IonScore	Exp Value	RT [min]
	High	0	40.12	0.00656604	72.0817
	A2	ΔCn	IonScore	Exp Value	RT [min]
	High	0	87.47	1.38593e-07	60.3411
	High	0	69.99	6.75554e-06	89.6339
	A2	ΔCn	IonScore	Exp Value	RT [min]
	High	0	42.22	0.000500826	103.287
	A2	ΔCn	IonScore	Exp Value	RT [min]
	High	0	80.09	5.91122e-07	98.1156
	High	0	51.97	0.000153115	124.652
	High	0	42.69	0.00153945	123.137
IPI00462934.3	Far upstream element-binding protein 2	DNA binding; RNA binding	nucleus; cytoplasm; cytosol	metabolic process; regulation of biological process; transport	76.7277
	A2	ΔCn	IonScore	Exp Value	RT [min]
	High	0	49.81	0.000436693	74.4885
	A2	ΔCn	IonScore	Exp Value	RT [min]
	High	0	88.92	6.75788e-08	90.908
	High	0	67.35	1.32352e-05	122.297
	High	0	66.33	1.09071e-05	28.122
	High	0	62.33	3.70465e-05	32.5592
	High	0	48.47	0.000701919	81.8821
	High	0	47.28	0.00117666	14.0545
	High	0	46.39	0.00137654	42.7444
	High	0	45.74	0.00167745	19.0732
	High	0	43.06	0.003475	78.2596
	High	0	41.91	0.0013592	67.1529
	High	0	39.25	0.00818284	91.021
	High	0	37.24	0.0088358	32.9743
	High	0	36.4	0.0108243	15.2517
	High	0	32.8	0.0244298	65.8044
	Medium	0	30.93	0.047748	112.361
	A2	ΔCn	IonScore	Exp Value	RT [min]
	High	0	101.98	2.76367e-09	94.4164
	High	0	98.24	3.3143e-09	96.763
	High	0	77.66	1.24091e-06	31.8904
	High	0	71.33	1.88469e-06	101.3
	High	0	68.01	7.86671e-06	64.2412
	High	0	62.33	4.03505e-05	20.7655
	High	0	62.27	4.38468e-05	78.3511
	High	0	61.52	5.81372e-06	109.49
	High	0	43.64	0.00229881	120.604
	High	0	40.84	0.00545167	61.6855
	High	0	40.52	0.000555283	71.6159
	High	0	38.97	0.00433537	95.1156
	High	0	36.66	0.015471	50.5359
	High	0	34.77	0.0219228	108.506
	High	0	32.27	0.0166908	116.213
	Medium	0	31.42	0.0363078	12.8351
	High	0	31.35	0.0197863	96.6923
	Medium	0	30.85	0.0329719	44.3883
	Medium	0	30.65	0.03642	22.8822
	Medium	0	29.27	0.0512257	63.5124
	High	0	27.41	0.015795	42.7486
	A2	ΔCn	IonScore	Exp Value	RT [min]
	High	0	65.76	1.65647e-05	98.7796
	High	0	56.33	0.000168205	69.5491
	High	0	49.64	0.000739313	55.525
	High	0	45.38	0.000181349	98.0375
	High	0	41.97	0.00361503	125.895
	High	0	41.22	0.0012006	100.196
	High	0	40.01	0.0053377	12.0162
	High	0	39.36	0.000725295	86.1807
	High	0	38.88	0.00912408	49.094
	High	0	33.07	0.020738	83.9675
	Medium	0	30.25	0.0415387	74.0645
	Medium	0	30.11	0.0326622	49.1898
IPI00223046.6	FH1/FH2 domain-containing protein 1	protein binding	cytoskeleton; nucleus; cytoplasm; cytosol	cell organization and biogenesis; metabolic process; regulation of biological process	129.52
	A2	ΔCn	IonScore	Exp Value	RT [min]
	High	0	86.09	1.88464e-07	94.8755
IPI00970023.1	filamin A-interacting protein 1-like isoform 2	catalytic activity; motor activity; protein binding; transporter activity	nucleus; cytoplasm; membrane; cytoskeleton	cell organization and biogenesis; transport; reproduction	101.862
	A2	ΔCn	IonScore	Exp Value	RT [min]
	High	0	57.92	2.67176e-05	66.0757
	High	0	47.36	0.0012865	56.9692
	A2	ΔCn	IonScore	Exp Value	RT [min]
	High	0	104.97	1.66056e-09	63.3495
	High	0	92.45	2.67645e-08	132.31
	High	0	85.64	1.98124e-07	46.2291
	High	0	85.48	1.4157e-07	34.1292
	High	0	81.82	4.76802e-08	93.7779
	High	0	78.18	5.30671e-07	57.8333
	High	0	74.36	1.39429e-06	82.5381
	High	0	73.33	3.0449e-06	40.2795
	High	0	69.53	1.00287e-06	33.4373
	High	0	67.73	9.73984e-06	71.7755
	High	0	66.28	5.68744e-06	67.097
	High	0	63.5	4.93585e-06	122.069
	High	0	63.33	1.66761e-05	15.5038
	High	0	62.63	1.56633e-05	59.4798
	High	0	62.35	3.22485e-05	68.0409
	High	0	60.49	7.02585e-05	37.3485
	High	0	60.3	6.39746e-05	51.081
	High	0	59.79	6.84302e-05	68.997
	High	0	59.74	6.4498e-05	48.0211
	High	0	59.27	8.50607e-05	42.7788
	High	0	57.58	4.08522e-05	52.4227
	High	0	57.11	0.000141719	55.4498
	High	0	56.78	0.000138005	43.2154
	High	0	56.61	0.000122015	79.6375
	High	0	56.57	0.00016588	62.1786
	High	0	56.19	0.00017095	82.4526
	High	0	55.53	4.68829e-05	47.2455
	High	0	54.69	0.000222624	46.3992
	High	0	53.61	0.000319448	82.2965
	High	0	51.84	0.000353504	94.4024
	High	0	51.39	0.000145947	51.6501
	High	0	50.99	0.000494813	28.7532
	High	0	50.95	0.000648446	53.4799
	High	0	50.12	0.000656118	33.6649
	High	0	50.04	0.000665839	60.2492
	High	0	49.95	0.00060189	22.4137
	High	0	48.28	0.000755598	60.481
	High	0	48.02	0.00114377	50.8572
	High	0	46.58	0.00160444	47.0659
	High	0	46.55	0.00109548	71.964
	High	0	45.98	0.00110907	84.5952
	High	0	45.95	0.00153856	68.2668
	High	0	45.58	0.00142913	92.8277
	High	0	45.23	0.000187722	80.6599
	High	0	44.84	0.0021884	52.5769
	High	0	44.36	0.00205205	17.7908
	High	0	43.85	0.00217381	65.9751
	High	0	43.68	0.00236987	43.6287
	High	0	43.47	0.00289883	64.2432
	High	0	43.41	0.00341572	33.2947
	High	0	43.41	0.00279779	9.92576
	High	0	42.98	0.00395248	74.8009
	High	0	42.73	0.00373868	55.1951
	High	0	42.31	0.00341919	56.4925
	High	0	42.23	0.00391062	62.0605
	High	0	41.42	0.00342165	95.4261
	High	0	41.4	0.00430315	69.1625
	High	0	40.96	0.00509466	77.8274
	High	0	39.75	0.00805033	31.1416
	High	0	39.09	0.0089955	88.5978
	High	0	39.04	0.00794583	36.728
	High	0	38.92	0.00409705	14.6423
	High	0	37.93	0.00722375	25.1233
	High	0	37.63	0.0096388	98.8865
	High	0	37.55	0.012033	23.5207
	High	0	36.74	0.0117887	57.2505
	High	0	35.9	0.0163863	79.002
	High	0	35.04	0.0222307	41.1072
	High	0	34.33	0.0225261	55.5865
	High	0	33.89	0.015067	36.3267
	High	0	33.87	0.00578388	43.3768
	Medium	0	33.8	0.0272007	78.5331
	High	0	33.7	0.0184069	88.0937
	Medium	0	32.75	0.0337643	29.9759
	High	0	32.14	0.0271258	33.6668
	Medium	0	31.76	0.0328069	86.0896
	Medium	0	30.16	0.0570587	22.0794
	Medium	0	29.67	0.0538394	17.3749
	Medium	0	29.05	0.0364021	81.7547
	Medium	0	28.83	0.028082	46.3717
	Medium	0	27.13	0.04386	51.732
	High	0	25.18	0.0189895	13.9708
	A2	ΔCn	IonScore	Exp Value	RT [min]
	High	0	63.93	2.15639e-05	99.3989
	High	0	59.25	5.54436e-05	87.4408
	High	0	58.73	6.07543e-05	62.165
	High	0	56.18	0.000124592	73.0279
	High	0	49.63	0.000643558	67.6555
	High	0	48.75	0.000845453	66.5473
	High	0	45.09	0.00183677	87.2821
	High	0	35.91	0.0119633	21.019
	High	0	33.93	0.016709	91.6519
	High	0	33.66	0.00955769	53.4484
IPI01026802.1	formin-like protein 2	protein binding	cytoplasm; cytoskeleton; membrane	cell organization and biogenesis; regulation of biological process	122.835
	A2	ΔCn	IonScore	Exp Value	RT [min]
	High	0	58.53	5.4359e-05	77.6976
	High	0	38.83	0.00473924	85.4948
	Medium	0	32.95	0.0366554	83.1033
	Medium	0	29.85	0.049221	66.8538
IPI00417149.2	general transcription factor 3C polypeptide 4 isoform 2	DNA binding; catalytic activity	nucleus; organelle lumen; membrane	metabolic process	76.6558
	A2	ΔCn	IonScore	Exp Value	RT [min]
	High	0	36.18	0.0163874	131.065
IPI00988665.1	glyceraldehyde-3-phosphate dehydrogenase-like	catalytic activity		metabolic process	34.2891
	A2	ΔCn	IonScore	Exp Value	RT [min]
	High	0	36.07	0.0234319	49.7027
	A2	ΔCn	IonScore	Exp Value	RT [min]
	High	0	37.41	0.00934991	106.694
IPI00137336.1	Glypican-1	metal ion binding; protein binding	extracellular; cytoplasm; endosome; Golgi; organelle lumen; membrane	cell differentiation; development; metabolic process; cell communication; cell organization and biogenesis; cellular homeostasis; regulation of biological process; response to stimulus	61.3207
	A2	ΔCn	IonScore	Exp Value	RT [min]
	High	0	54.58	0.000209873	68.8718
	A2	ΔCn	IonScore	Exp Value	RT [min]
	High	0	70.16	6.15405e-06	60.5765
	High	0	69.96	5.83853e-06	79.734
	High	0	67.12	6.99689e-06	76.4364
	High	0	64.5	7.82364e-06	64.9548
	High	0	62.78	3.78815e-05	68.0609
	High	0	58.02	7.2018e-05	83.0824
	High	0	57.87	6.64652e-05	84.5062
	High	0	55.04	0.000231236	48.7113
	High	0	54.98	0.000202843	58.5085
	High	0	54.86	0.000170316	91.7667
	High	0	54.29	0.000212822	57.7559
	High	0	54.05	0.000219207	51.95
	High	0	47.59	0.0007812	132.503
	High	0	47.23	0.000326429	45.7663
	High	0	46.47	0.00130859	32.8062
	High	0	45.7	0.00161896	46.6502
	High	0	42.45	0.00361506	51.8388
	High	0	41.22	0.00423984	72.2146
	High	0	40.89	0.00480676	63.9734
	High	0	40.53	0.00622236	36.3683
	High	0	35.02	0.018556	11.5582
	High	0	33.64	0.00947205	63.5167
	Medium	0	30.08	0.0576286	108.452
IPI00828543.3	Host cell factor 1	protein binding; catalytic activity	nucleus; organelle lumen; cytoplasm; mitochondrion	metabolic process; regulation of biological process; cell organization and biogenesis; reproduction	210.306
	A2	ΔCn	IonScore	Exp Value	RT [min]
	High	0	36.65	0.00484449	100.588
	High	0	35.13	0.0162198	14.542
	Medium	0	28.39	0.0380303	35.65
IPI00311329.1	Importin subunit alpha-1	protein binding; transporter activity	nucleus; cytoplasm	transport	60.1444
	A2	ΔCn	IonScore	Exp Value	RT [min]
	High	0	39.75	0.00234625	124.645
IPI00129792.1	Importin subunit alpha-4	protein binding; transporter activity	nucleus; cytoplasm	transport	57.8867
	A2	ΔCn	IonScore	Exp Value	RT [min]
	High	0	65.52	5.41449e-06	132.059
	A2	ΔCn	IonScore	Exp Value	RT [min]
	High	0	82.41	2.43999e-07	84.7427
	High	0	60.87	4.75937e-05	118.987
	High	0	51.07	0.000397067	26.4575
	High	0	47.72	0.000988908	100.828
	High	0	42.63	0.0030426	98.1569
	High	0	35.32	0.00276139	108.656
IPI00128880.3	Importin-4	protein binding; transporter activity	nucleus; membrane; cytoplasm	transport	119.198
	A2	ΔCn	IonScore	Exp Value	RT [min]
	High	0	53.27	9.16051e-05	126.959
	High	0	39.68	0.000673774	107.248
IPI00331444.7	Importin-7	protein binding; transporter activity	nucleus; membrane; cytoplasm; Golgi	transport	119.41
	A2	ΔCn	IonScore	Exp Value	RT [min]
	High	0	51.21	0.00058314	106.699
	A2	ΔCn	IonScore	Exp Value	RT [min]
	High	0	45.93	0.00140271	88.297
	High	0	44.38	0.000346516	86.9106
IPI00331315.9	Insulin-like growth factor 2 mRNA-binding protein 3	nucleotide binding; RNA binding	nucleus; cytoplasm	metabolic process; regulation of biological process	63.5355
	A2	ΔCn	IonScore	Exp Value	RT [min]
	High	0	61.24	5.63717e-05	57.0274
	High	0	45.5	0.000937112	78.9949
	High	0	42.86	0.000388205	96.4692
	A2	ΔCn	IonScore	Exp Value	RT [min]
	High	0	54.17	0.000235629	105.651
	A2	ΔCn	IonScore	Exp Value	RT [min]
	High	0	53.4	4.86799e-05	44.855
	High	0	43.84	0.00213133	105.533
	High	0	40.05	0.0068309	67.2645
	High	0	39.79	0.00690599	75.7795
	High	0	34.89	0.00951937	126.805
	High	0	34.07	0.0194696	116.662
	Medium	0	29.06	0.0570539	20.2699
	High	0	27.01	0.0234899	95.4127
IPI00830178.2	Isoform 1 of Angiomotin	receptor activity; protein binding	cytoskeleton; cytoplasm; nucleus; cell surface; membrane	cell differentiation; development; cellular component movement; response to stimulus; regulation of biological process; cell organization and biogenesis; metabolic process; cell communication	120.841
	A2	ΔCn	IonScore	Exp Value	RT [min]
	High	0	57.72	0.000116387	45.14
	High	0	50.47	0.000262947	13.3126
	High	0	47.73	0.000973984	107.307
	High	0	44.07	0.00223097	32.7748
	High	0	36.97	0.0115523	14.2524
	High	0	36.74	0.01217	51.6674
	Medium	0	32.4	0.0324548	67.3611
	Medium	0	31.75	0.0522311	50.6282
	Medium	0	30.73	0.029627	34.4075
	Medium	0	29.65	0.050511	35.9882
	Medium	0	27.33	0.0399442	27.8783
	A2	ΔCn	IonScore	Exp Value	RT [min]
	High	0	58.14	4.93379e-05	123.189
	High	0	49.93	0.000345016	20.9326
	High	0	37.75	0.00122553	95.5723
	High	0	37.09	0.0134263	37.2155
IPI00875791.1	Isoform 1 of ATP-dependent RNA helicase A	nucleotide binding; protein binding; DNA binding; RNA binding; catalytic activity	nucleus; organelle lumen; cytoplasm; cytoskeleton	response to stimulus; metabolic process; regulation of biological process	149.381
	A2	ΔCn	IonScore	Exp Value	RT [min]
	High	0	68.06	5.58825e-06	112.404
	High	0	50.19	0.000225898	62.3655
	High	0	47.81	0.00120788	91.5602
	High	0	37.2	0.011509	85.5374
	High	0	36.23	0.0120664	71.3677
	High	0	33.38	0.00622213	112.91
	Medium	0	32.19	0.046806	44.0408
	Medium	0	31.65	0.0497888	31.067
	High	0	30.05	0.025653	55.1152
	Medium	0	29.16	0.0601234	126.551
	A2	ΔCn	IonScore	Exp Value	RT [min]
	High	0	86.02	2.07779e-07	82.223
	High	0	68.52	4.42905e-06	24.4997
	High	0	65.31	7.44939e-06	77.6768
	High	0	63.43	3.22752e-05	29.5892
	High	0	55.87	2.30351e-05	49.0569
	High	0	45.67	0.00063554	48.3599
	High	0	44.8	0.00268713	72.8263
	High	0	32.38	0.0289626	53.2531
	High	0	32.13	0.0237592	7.14131
IPI00275153.1	Isoform 1 of Condensin complex subunit 1	protein binding	chromosome; nucleus; organelle lumen; cytoplasm	cell organization and biogenesis; metabolic process; cell division	155.567
	A2	ΔCn	IonScore	Exp Value	RT [min]
	High	0	41.37	0.00489466	128.442
IPI00330066.5	Isoform 1 of Enhancer of mRNA-decapping protein 4	protein binding	cytoplasm; nucleus		152.389
	A2	ΔCn	IonScore	Exp Value	RT [min]
	High	0	136.68	1.55073e-12	74.9714
	High	0	129.86	7.55465e-12	69.4904
	High	0	109.76	5.69625e-10	103.493
	High	0	78.48	9.56445e-07	52.1484
	High	0	77.65	1.15701e-06	106.028
	High	0	70.44	2.52118e-06	77.834
	High	0	67.77	9.85108e-06	115.088
	High	0	67.35	8.92774e-06	74.73
	High	0	63.69	6.43482e-06	50.111
	High	0	56.77	0.000156416	63.9362
	High	0	52.52	0.00043885	73.1037
	High	0	52.29	0.000349104	65.3367
	High	0	41.76	0.00274391	36.4279
	High	0	41.2	0.00345911	115.044
	High	0	39.97	0.00574958	75.7728
	High	0	38.8	0.0105724	65.9423
	High	0	37.6	0.00604755	101.733
	High	0	37.41	0.006436	26.3285
	High	0	36.91	0.00436946	45.0017
	High	0	35.03	0.0207902	77.5819
	Medium	0	22.09	0.0528404	61.6539
IPI00117454.1	Isoform 1 of Epidermal growth factor receptor substrate 15	metal ion binding; protein binding	cytoplasm; endosome; membrane	transport; cell organization and biogenesis	98.4104
	A2	ΔCn	IonScore	Exp Value	RT [min]
	High	0	37.22	0.0114561	90.2936
	High	0	33.84	0.0237296	98.2529
	A2	ΔCn	IonScore	Exp Value	RT [min]
	High	0	58.53	5.4359e-05	77.6976
	High	0	45.79	0.00150007	97.7194
	High	0	38.83	0.00473924	85.4948
IPI00114424.9	Isoform 1 of HEAT repeat-containing protein 5A				219.754
	A2	ΔCn	IonScore	Exp Value	RT [min]
	High	0	31.81	0.0267625	93.1217
IPI00121760.5	Isoform 1 of Heterogeneous nuclear ribonucleoprotein L-like	nucleotide binding; RNA binding	nucleus	metabolic process; regulation of biological process	64.0843
	A2	ΔCn	IonScore	Exp Value	RT [min]
	Medium	0	32.87	0.0407711	96.6738
	A2	ΔCn	IonScore	Exp Value	RT [min]
	High	0	44.57	0.000249635	77.5308
	High	0	39.04	0.00594378	132.513
	High	0	35.36	0.0179009	60.0064
	High	0	35.33	0.015563	102.52
IPI00330497.4	Isoform 1 of KN motif and ankyrin repeat domain-containing protein 2	protein binding	cytoplasm; mitochondrion	metabolic process; regulation of biological process; cell death; cell proliferation; cell communication; response to stimulus; cell organization and biogenesis	90.1896
	A2	ΔCn	IonScore	Exp Value	RT [min]
	High	0	47.87	0.000824691	94.2475
IPI00929786.1	Isoform 1 of La-related protein 1	RNA binding	cytoplasm	cell communication; metabolic process; regulation of biological process; response to stimulus	121.077
	A2	ΔCn	IonScore	Exp Value	RT [min]
	High	0	65.87	1.53869e-05	23.4468
	High	0	54.25	0.000109557	95.0551
	High	0	38.66	0.00903319	10.7778
	High	0	34.67	0.0253677	45.8964
IPI00654388.2	Isoform 1 of Leucine-rich repeat flightless-interacting protein 1	DNA binding; protein binding	nucleus; cytoplasm	metabolic process; regulation of biological process	79.2012
	A2	ΔCn	IonScore	Exp Value	RT [min]
	High	0	113.15	3.45699e-10	67.5643
	High	0	69.75	2.52632e-06	28.6453
	High	0	60.28	4.62218e-05	52.1201
	High	0	54.32	0.000158841	72.764
	High	0	51.38	0.00034897	25.5718
	High	0	50.69	0.000496078	18.4012
	High	0	43.85	0.00288262	11.0505
	High	0	39.91	0.00863715	41.0944
	High	0	34.47	0.0241695	25.8227
IPI00623401.4	Isoform 1 of Liprin-beta-1	catalytic activity; motor activity; protein binding	chromosome; nucleus; organelle lumen; cytoplasm; membrane; cytoskeleton	cell organization and biogenesis; reproduction	108.472
	A2	ΔCn	IonScore	Exp Value	RT [min]
	High	0	37.15	0.00542598	12.3594
	Medium	0	33.41	0.0413625	78.2822
	Medium	0	32.47	0.0416186	62.4992
IPI00408119.6	Isoform 1 of Microtubule-associated protein 4	protein binding	cytoplasm; cytoskeleton; membrane	cell organization and biogenesis; cellular component movement; cell division	117.357
	A2	ΔCn	IonScore	Exp Value	RT [min]
	High	0	60.8	5.48548e-05	36.7903
	High	0	46.58	0.000838484	21.3081
	High	0	46.52	0.000857948	17.9179
	High	0	45.55	0.00150311	45.5734
	Medium	0	30.18	0.0492173	105.46
	Medium	0	29.61	0.0543149	44.5789
	A2	ΔCn	IonScore	Exp Value	RT [min]
	High	0	59.14	2.62692e-05	116.658
IPI00671847.3	Isoform 1 of Protein phosphatase 1 regulatory subunit 12A	catalytic activity; enzyme regulator activity; protein binding	chromosome; cytoplasm; cytoskeleton	metabolic process; cell organization and biogenesis; regulation of biological process; transport	114.927
	A2	ΔCn	IonScore	Exp Value	RT [min]
	High	0	94.07	4.21123e-09	59.4485
	High	0	92.36	2.51471e-08	12.9082
	High	0	86.29	1.35104e-07	40.8471
	High	0	80.98	2.9845e-07	83.7596
	High	0	70.47	4.90894e-06	54.2666
	High	0	70.13	6.17244e-06	111.944
	High	0	68.8	1.05658e-05	55.4519
	High	0	67.55	1.10134e-05	78.0585
	High	0	65.54	1.6476e-05	34.4349
	High	0	62.65	3.52569e-05	123.134
	High	0	61.37	4.97855e-05	25.4921
	High	0	57.4	0.000150398	45.8033
	High	0	53.38	0.00025738	12.0463
	High	0	53.18	0.000279608	67.4826
	High	0	50.97	0.000350327	55.3502
	High	0	50.92	0.000504067	62.8691
	High	0	49.45	0.000681006	38.4598
	High	0	47.78	0.000819452	76.752
	High	0	47	0.000540716	41.7883
	High	0	46.76	0.000788627	17.6239
	High	0	46.48	0.00168904	53.1498
	High	0	44.93	0.0019523	23.8573
	High	0	44.41	0.00186193	30.613
	High	0	42.91	0.00336942	61.3061
	High	0	42.69	0.00222036	11.2877
	High	0	41.79	0.00242702	15.8614
	High	0	38.33	0.00863729	14.6005
	High	0	35.6	0.0156302	36.3766
	High	0	35.27	0.00577989	25.4782
	High	0	34.59	0.0110343	55.6899
	A2	ΔCn	IonScore	Exp Value	RT [min]
	High	0	68.95	6.95969e-06	93.5747
	High	0	67.49	1.21915e-05	44.1333
	High	0	55.21	5.63432e-05	22.3026
	High	0	42.25	0.00374969	49.0342
	High	0	41.44	0.00410578	71.8828
	Medium	0	31.16	0.0549698	77.1103
	Medium	0	31	0.0349902	118.684
IPI00226384.2	Isoform 1 of Retinoblastoma-binding protein 5	protein binding; catalytic activity; DNA binding	nucleus; organelle lumen	metabolic process; regulation of biological process; response to stimulus; cell organization and biogenesis	59.0606
	A2	ΔCn	IonScore	Exp Value	RT [min]
	High	0	32.99	0.0173057	98.1549
	A2	ΔCn	IonScore	Exp Value	RT [min]
	High	0	95.9	1.08342e-08	124.626
	High	0	64.07	2.44055e-05	80.7955
	High	0	61.38	4.05737e-05	20.8215
	High	0	48.97	0.000276982	71.4977
	High	0	48.53	0.000773652	37.4165
	High	0	41.16	0.00556972	65.5246
	High	0	30.99	0.0246809	89.6432
	High	0	28.64	0.0152502	43.3346
IPI00753815.3	Isoform 1 of Spectrin alpha chain, brain	protein binding; metal ion binding	cytoplasm; cytoskeleton; membrane	cell organization and biogenesis; regulation of biological process	284.422
	A2	ΔCn	IonScore	Exp Value	RT [min]
	High	0	151.17	5.75168e-14	61.4207
	High	0	113.65	1.80591e-10	66.2183
	High	0	113.14	1.74219e-10	103.706
	High	0	106.22	1.43746e-09	94.8527
	High	0	102.95	2.84675e-09	64.6162
	High	0	93.56	1.94285e-08	112.937
	High	0	92.01	4.29323e-08	38.1279
	High	0	85.38	1.64424e-07	43.7939
	High	0	84.98	1.9363e-07	119.804
	High	0	83.61	2.88527e-07	107.197
	High	0	83.54	2.98968e-07	112.689
	High	0	83.44	3.05253e-07	81.1241
	High	0	82.86	2.26712e-07	107.504
	High	0	82.53	3.10789e-07	87.9606
	High	0	82.48	1.95468e-07	73.4088
	High	0	82.31	3.4515e-07	35.4052
	High	0	79.65	6.41143e-07	111.592
	High	0	79.56	5.80977e-07	97.5182
	High	0	78.53	7.25255e-07	91.4772
	High	0	78.22	5.49912e-07	115.902
	High	0	73.44	3.09782e-06	62.8199
	High	0	71.49	4.09781e-06	29.7034
	High	0	69.94	7.50801e-06	38.9374
	High	0	69.43	3.40935e-06	35.6635
	High	0	68.8	7.59316e-06	27.3331
	High	0	68.6	1.08015e-05	43.8472
	High	0	68.22	8.4596e-06	30.8394
	High	0	68.21	1.05253e-05	132.522
	High	0	66.03	1.20489e-05	52.636
	High	0	65.66	1.78198e-05	80.9905
	High	0	62.76	3.10383e-05	56.3814
	High	0	62.34	4.17163e-05	28.6379
	High	0	61.88	4.5599e-05	83.4998
	High	0	61.62	4.71038e-05	50.5844
	High	0	58.65	6.10651e-05	17.8709
	High	0	58.59	7.20146e-05	98.789
	High	0	58.32	0.000108362	94.9994
	High	0	58.13	4.65292e-05	63.8246
	High	0	56.89	0.000133428	74.8287
	High	0	55.88	0.000113878	77.6157
	High	0	55.86	0.000191061	65.8024
	High	0	55.21	0.000216183	19.5525
	High	0	54.98	0.000188547	7.40286
	High	0	54.34	0.000130686	44.9749
	High	0	54.16	0.000243654	30.8968
	High	0	53.72	0.000239273	89.7327
	High	0	53.02	0.00032652	44.9619
	High	0	52.85	0.000321137	70.0567
	High	0	50.88	0.000529554	40.8104
	High	0	50.85	0.000612982	63.3789
	High	0	50.77	0.000551513	36.0993
	High	0	50.33	0.000484732	128.258
	High	0	49.86	0.00042085	44.4581
	High	0	49.56	0.000710452	25.5317
	High	0	49.37	0.00088905	53.0303
	High	0	48.76	0.000913357	53.3347
	High	0	48.55	0.000978156	49.1855
	High	0	48.27	0.000581596	38.0072
	High	0	47.91	0.000881854	48.3925
	High	0	46.94	0.00108535	114.305
	High	0	46.64	0.00140467	86.393
	High	0	46.55	0.00150269	59.9826
	High	0	45.49	0.000680796	80.9883
	High	0	45.05	0.00185845	86.5629
	High	0	44.92	0.00286997	30.2122
	High	0	44.5	0.000640438	58.8426
	High	0	44.39	0.00157757	71.0376
	High	0	44.27	0.00196969	22.556
	High	0	44.22	0.00206062	116.92
	High	0	43.32	0.00286103	15.3473
	High	0	43.19	0.00209404	72.6099
	High	0	43	0.0021952	63.0226
	High	0	42.93	0.00400079	44.5427
	High	0	42.92	0.0031294	63.0428
	High	0	42.78	0.0034639	76.8177
	High	0	42.58	0.00334835	36.9185
	High	0	42.44	0.000738363	126.341
	High	0	41.99	0.00282688	45.08
	High	0	41.98	0.0031535	100.874
	High	0	41.84	0.00317171	75.6832
	High	0	41.39	0.00230902	80.134
	High	0	41.38	0.00471965	27.7096
	High	0	41.1	0.00485154	45.3005
	High	0	40.9	0.0040479	29.6119
	High	0	40.57	0.00448147	92.2957
	High	0	40.42	0.00548324	44.1195
	High	0	40.27	0.00513559	54.9584
	High	0	39.98	0.00239099	29.9739
	High	0	39.87	0.00836674	49.5973
	High	0	39.82	0.00473212	107.23
	High	0	39.59	0.0081766	46.3814
	High	0	39.59	0.00712705	32.1002
	High	0	39.58	0.00697274	73.4899
	High	0	37.92	0.00832202	33.8748
	High	0	37.63	0.0116494	31.4602
	High	0	37.6	0.0111306	45.523
	High	0	37.41	0.0124363	56.9228
	High	0	37.15	0.0149094	79.7524
	High	0	36.72	0.00893818	17.0472
	High	0	36.56	0.0145176	41.0447
	High	0	35.75	0.0214321	62.6081
	High	0	35.16	0.0164586	74.3067
	High	0	35.01	0.0230946	70.8691
	High	0	34.54	0.0198807	62.4434
	High	0	34.5	0.0253514	59.1895
	High	0	34.41	0.0105775	91.1096
	High	0	34.3	0.0180938	106.192
	High	0	34.15	0.0232293	42.4069
	High	0	33.98	0.0237767	52.2532
	Medium	0	33.97	0.0407681	12.6458
	Medium	0	33.86	0.0339815	30.758
	High	0	33.67	0.0235815	60.4131
	High	0	33.25	0.0262126	80.8461
	Medium	0	33.16	0.0352633	84.9441
	Medium	0	33.09	0.0352472	36.3851
	Medium	0	33.07	0.033018	63.5566
	High	0	33.04	0.0308136	70.8013
	High	0	32.66	0.0210567	36.0338
	Medium	0	32.58	0.0455464	70.4528
	Medium	0	32.55	0.0366341	45.1381
	Medium	0	32.15	0.04346	40.0426
	Medium	0	31.73	0.0387414	84.2926
	Medium	0	31.64	0.0476072	25.9576
	Medium	0	31.52	0.0539795	30.3669
	High	0	30.96	0.0226474	57.2264
	Medium	0	30.92	0.0355598	22.8932
	High	0	30.92	0.0172742	13.0155
	Medium	0	30.05	0.0339568	60.9895
	Medium	0	29.15	0.0367896	76.2389
	Medium	0	28.66	0.0334915	20.8898
	A2	ΔCn	IonScore	Exp Value	RT [min]
	High	0	103.9	3.26108e-09	60.9518
	High	0	99.83	5.2152e-09	78.396
	High	0	87.43	1.15027e-07	61.7856
	High	0	87.34	1.27214e-07	89.2745
	High	0	86	1.66412e-07	55.2397
	High	0	83.9	2.87407e-07	59.6631
	High	0	83.81	2.98624e-07	81.785
	High	0	82.54	3.98388e-07	76.0502
	High	0	82.49	3.63546e-07	88.3832
	High	0	81.91	4.92145e-07	42.1472
	High	0	81.28	5.74188e-07	78.2958
	High	0	80.98	4.6563e-07	27.9488
	High	0	78.53	4.69241e-07	119.61
	High	0	77.84	9.76757e-07	50.7022
	High	0	77.52	1.33289e-06	44.1926
	High	0	73.34	3.35072e-06	31.54
	High	0	71.58	5.21963e-06	88.0728
	High	0	71.27	4.29581e-06	83.3066
	High	0	70.64	4.8672e-06	128.604
	High	0	69.22	3.40473e-06	49.5953
	High	0	66.91	1.4575e-05	78.5761
	High	0	66.33	1.62152e-05	68.6754
	High	0	65.12	2.24555e-05	99.4063
	High	0	64.27	3.12382e-06	33.645
	High	0	64.08	2.52874e-05	57.4806
	High	0	64.03	2.89606e-05	63.1742
	High	0	62.64	3.91225e-05	82.4168
	High	0	61.79	4.72491e-05	132.472
	High	0	61.15	1.26998e-05	34.226
	High	0	60.56	6.72892e-05	27.8825
	High	0	60.35	4.76508e-05	93.5568
	High	0	59.9	2.86522e-05	76.107
	High	0	59.82	7.12424e-05	51.7833
	High	0	57.96	0.000113329	56.8573
	High	0	57.66	9.46104e-05	96.1416
	High	0	56.81	0.000128092	63.2046
	High	0	54.09	2.51513e-05	66.0276
	High	0	52.99	0.00033456	116.07
	High	0	51.76	0.000440759	63.6511
	High	0	51.58	0.000463234	80.5136
	High	0	49.1	0.00011626	20.0688
	High	0	48.31	0.00104259	46.2174
	High	0	48.13	0.000927507	52.7489
	High	0	47.8	0.000668814	132.618
	High	0	47.52	0.000931962	67.5285
	High	0	47.27	0.00107156	20.5653
	High	0	46.55	0.000573192	92.2446
	High	0	46.39	0.00206768	34.1183
	High	0	45.88	0.00136472	73.1015
	High	0	45.42	0.00160907	50.959
	High	0	45.31	0.00120427	23.9266
	High	0	45.26	0.00211475	81.618
	High	0	43.97	0.00287822	100.96
	High	0	42.82	0.00211048	43.1509
	High	0	42.45	0.00401041	31.9791
	High	0	42.41	0.00220174	80.2716
	High	0	42.24	0.00407477	57.0427
	High	0	42	0.00384884	51.5006
	High	0	41.92	0.00466591	114.216
	High	0	41.35	0.00425405	108.007
	High	0	41.21	0.00414366	53.4422
	High	0	40.77	0.00197238	65.7026
	High	0	39.57	0.00574673	56.0902
	High	0	38.89	0.00731476	82.72
	High	0	38.85	0.00360977	70.7705
	High	0	38.57	0.007471	38.8195
	High	0	38.21	0.00222737	44.4841
	High	0	37.77	0.00826354	61.6897
	High	0	37.59	0.00740268	54.2153
	High	0	36.98	0.00890988	42.836
	High	0	36.96	0.0109647	28.3324
	High	0	36.79	0.00821939	36.4178
	High	0	36.14	0.0170984	7.8994
	High	0	35.91	0.0121813	76.6045
	High	0	35.63	0.0131977	27.3782
	High	0	35.47	0.0177086	53.3211
	High	0	33.87	0.0210845	51.2324
	High	0	33.48	0.023245	57.5486
	High	0	33.29	0.0262067	74.2117
	Medium	0	33.22	0.0312062	53.4818
	Medium	0	33.09	0.0385363	22.9974
	Medium	0	32.48	0.033642	53.1079
	High	0	32.37	0.0260453	10.8216
	Medium	0	32.36	0.0316807	58.5044
	High	0	32.19	0.0243089	24.8897
	High	0	32.1	0.00385935	52.5018
	Medium	0	32.08	0.0420291	46.9333
	Medium	0	31.84	0.0366924	80.909
	High	0	31.73	0.0259843	17.2191
	Medium	0	31.55	0.0522432	8.37422
	Medium	0	31.53	0.0458403	33.8243
	Medium	0	31.48	0.0461578	70.1713
	Medium	0	31.46	0.0391544	45.8653
	Medium	0	31.37	0.042965	45.2617
	Medium	0	31.16	0.0401938	57.672
	High	0	31.05	0.0197487	38.6526
	Medium	0	30.2	0.0529543	25.8924
	High	0	29.63	0.0260799	77.0704
	Medium	0	29.12	0.0566997	104.321
	High	0	28.05	0.023893	31.6972
	Medium	0	18.34	0.0917307	34.0036
IPI00869363.1	Isoform 1 of Spermatid-associated protein		cytoplasm		51.8331
	A2	ΔCn	IonScore	Exp Value	RT [min]
	High	0	19.71	0.0669136	42.3846
	A2	ΔCn	IonScore	Exp Value	RT [min]
	High	0	81.62	3.40539e-07	59.5757
	High	0	57.46	0.000128862	81.6431
	High	0	49.1	0.000605292	51.827
	High	0	47.83	0.0012147	85.6219
	High	0	46.44	0.00167743	68.7874
	Medium	0	30.22	0.0323681	59.1643
	Medium	0	29.51	0.029777	43.8867
	Medium	0	29.11	0.0404441	65.5978
IPI00875579.1	Isoform 1 of TRIO and F-actin-binding protein	RNA binding; protein binding	nucleus; cytoplasm; cytoskeleton	cell differentiation; cell organization and biogenesis; regulation of biological process	66.9388
	A2	ΔCn	IonScore	Exp Value	RT [min]
	Medium	0	31.87	0.0304586	14.8848
	Medium	0	31.26	0.0320217	29.9849
IPI00955687.1	Isoform 1 of Ubiquitin carboxyl-terminal hydrolase 10	protein binding; catalytic activity	nucleus; cytoplasm; endosome; cytoskeleton	metabolic process; response to stimulus; regulation of biological process; cell communication	86.9677
	A2	ΔCn	IonScore	Exp Value	RT [min]
	High	0	56.15	0.000159186	79.4426
	Medium	0	19.81	0.0653905	75.6567
	A2	ΔCn	IonScore	Exp Value	RT [min]
	High	0	78.48	7.86867e-07	71.6005
	High	0	36.62	0.0164853	10.0727
IPI00283057.1	Isoform 2 of 5'-3' exoribonuclease 2	catalytic activity			108.039
	A2	ΔCn	IonScore	Exp Value	RT [min]
	High	0	41.69	0.00442161	63.0159
	Medium	0	31.31	0.0366105	70.0001
	A2	ΔCn	IonScore	Exp Value	RT [min]
	High	0	42.82	0.00181271	115.128
	High	0	36.22	0.0131807	105.724
IPI00229069.1	Isoform 2 of Anthrax toxin receptor 1	receptor activity; protein binding	membrane		58.5779
	A2	ΔCn	IonScore	Exp Value	RT [min]
	High	0	63.54	1.04893e-05	97.272
	High	0	45.88	0.000779843	43.5475
	A2	ΔCn	IonScore	Exp Value	RT [min]
	High	0	75.69	1.26389e-06	114.066
IPI00113849.1	Isoform 2 of Cell division control protein 42 homolog	nucleotide binding; catalytic activity; protein binding	cytoplasm; Golgi; membrane; cytoskeleton; cytosol	metabolic process; regulation of biological process; development; cell differentiation; cell organization and biogenesis; cell communication; response to stimulus; transport; cell death; cell proliferation; cell division; cellular component movement	21.245
	A2	ΔCn	IonScore	Exp Value	RT [min]
	High	0	43.24	0.00122829	87.8172
	High	0	43.03	0.00471606	30.4083
	Medium	0	31.15	0.0464254	105.714
	Medium	0	30.85	0.0460045	32.0516
IPI00137229.1	Isoform 2 of Cellular nucleic acid-binding protein	DNA binding; RNA binding; metal ion binding	nucleus; cytoplasm; endoplasmic reticulum; cytosol	metabolic process; regulation of biological process; cell proliferation	18.7292
	A2	ΔCn	IonScore	Exp Value	RT [min]
	High	0	50.88	0.000426664	84.0284
IPI00623191.2	Isoform 2 of Collagen alpha-1(I) chain	structural molecule activity; protein binding	extracellular		117.748
	A2	ΔCn	IonScore	Exp Value	RT [min]
	High	0	42.68	0.00318042	56.0522
	High	0	40.87	0.00509904	49.8997
	High	0	37.16	0.0106251	52.9506
IPI00845782.1	Isoform 2 of CST complex subunit CTC1	DNA binding; protein binding	chromosome; nucleus; organelle lumen; membrane	cell organization and biogenesis; metabolic process; regulation of biological process	133.815
	A2	ΔCn	IonScore	Exp Value	RT [min]
	High	0	35.41	0.0154229	126.379
IPI00856874.2	Isoform 2 of Cullin-7	protein binding	membrane	metabolic process	192.042
	A2	ΔCn	IonScore	Exp Value	RT [min]
	Medium	0	30.07	0.0388684	111.073
	A2	ΔCn	IonScore	Exp Value	RT [min]
	High	0	41.85	0.00197245	91.8166
	High	0	33.63	0.0111412	45.1528
IPI00756325.1	Isoform 2 of Extended synaptotagmin-1	protein binding			99.6112
	A2	ΔCn	IonScore	Exp Value	RT [min]
	High	0	29.62	0.00683148	89.412
IPI00378207.1	Isoform 2 of F-box/WD repeat-containing protein 8	protein binding		metabolic process; development	51.641
	A2	ΔCn	IonScore	Exp Value	RT [min]
	High	0	45.51	0.00190084	103.396
IPI00750260.1	Isoform 2 of Fibulin-2	metal ion binding	extracellular		126.399
	A2	ΔCn	IonScore	Exp Value	RT [min]
	Medium	0	30.2	0.034141	80.7485
	A2	ΔCn	IonScore	Exp Value	RT [min]
	High	0	75.37	1.53478e-06	76.5133
	High	0	74.99	2.30269e-06	69.0036
	High	0	57.64	9.42723e-05	30.1146
	High	0	53.26	0.000218329	76.6247
	High	0	46.23	0.00148895	72.252
	High	0	41.18	0.00528502	55.186
	High	0	39.97	0.00568413	70.4439
	High	0	39.03	0.00421962	28.4547
	High	0	38.63	0.00531902	45.1233
	High	0	38.2	0.0088392	90.6613
	High	0	36.06	0.00808878	112.977
	Medium	0	33	0.0279662	85.4836
	High	0	29.96	0.021598	113.403
IPI00554841.1	Isoform 2 of GEM-interacting protein	enzyme regulator activity; metal ion binding		cell communication; regulation of biological process; response to stimulus; metabolic process	93.0721
	A2	ΔCn	IonScore	Exp Value	RT [min]
	High	0	89.01	7.4043e-08	108.594
	High	0	67.39	8.52671e-06	122.606
	High	0	60.64	6.36015e-05	80.6014
	High	0	53.75	6.93691e-05	80.9275
	High	0	52.27	0.000215528	23.1101
	High	0	40.51	0.00449491	37.5091
	High	0	35.15	0.0211859	68.8432
IPI00756571.1	Isoform 2 of Hamartin	catalytic activity; motor activity; protein binding; enzyme regulator activity	chromosome; nucleus; organelle lumen; cytoplasm; cytosol; membrane; cytoskeleton	cell organization and biogenesis; development; regulation of biological process; transport; metabolic process; reproduction; cell proliferation; cell communication; response to stimulus; cellular homeostasis; cell differentiation	128.595
	A2	ΔCn	IonScore	Exp Value	RT [min]
	High	0	83.86	1.06488e-07	100.912
	High	0	76.18	1.53029e-06	62.1079
	High	0	66.46	1.57709e-05	122.225
	High	0	66.3	8.26341e-06	96.5783
	High	0	61.59	4.84705e-05	35.4344
	High	0	58.94	7.83095e-05	47.3249
	High	0	55.67	6.85678e-05	78.8135
	High	0	53.91	0.000123559	85.0654
	High	0	53.83	0.000287937	102.964
	High	0	52.63	0.000348194	19.9856
	High	0	44.6	0.00167821	65.5199
	High	0	43.89	0.0023805	37.7513
	High	0	41.26	0.0044142	80.8206
	High	0	40.81	0.00331525	132.496
	High	0	40.55	0.00511008	91.6591
	High	0	38.8	0.000825115	89.4504
	High	0	38.28	0.004807	127.156
	High	0	36.64	0.0144694	77.2725
	High	0	36.28	0.0109745	10.8701
	High	0	35.48	0.00736162	56.3181
	High	0	34.32	0.00673087	78.54
	High	0	27.11	0.0313203	64.9109
	Medium	0	26.96	0.0354415	95.3604
	Medium	0	20.01	0.0624474	76.4498
IPI00317711.1	Isoform 2 of Heat shock 70 kDa protein 4L				92.1935
	A2	ΔCn	IonScore	Exp Value	RT [min]
	High	0	54.5	0.000275513	74.4538
	High	0	51.62	0.000550233	71.1318
	High	0	35.41	0.0190915	79.8323
	A2	ΔCn	IonScore	Exp Value	RT [min]
	High	0	64.63	2.21245e-05	59.1103
	High	0	50.79	0.000695707	109.876
IPI00471268.1	Isoform 2 of Kin of IRRE-like protein 1	protein binding	membrane	metabolic process; regulation of biological process; cell organization and biogenesis	69.923
	A2	ΔCn	IonScore	Exp Value	RT [min]
	High	0	60.05	3.00026e-05	30.5122
	A2	ΔCn	IonScore	Exp Value	RT [min]
	High	0	45.03	0.00227687	76.7295
	High	0	44.66	0.00236992	20.0414
	Medium	0	32.11	0.0459845	22.4399
IPI00758078.2	Isoform 2 of Leucine-rich repeat and calponin homology domain-containing protein 2	protein binding			82.3405
	A2	ΔCn	IonScore	Exp Value	RT [min]
	High	0	60.8	5.64352e-05	62.2384
	A2	ΔCn	IonScore	Exp Value	RT [min]
	High	0	113.68	3.0277e-10	131.253
	High	0	85.1	1.33501e-07	90.0525
	High	0	80.89	3.85762e-07	115.255
	High	0	76.51	9.60436e-07	103.575
	High	0	63.65	3.50609e-05	55.3564
	High	0	54.33	0.000235408	40.4064
	High	0	52.88	0.000386937	45.5066
	High	0	50.05	0.000662331	40.8044
	High	0	44.78	0.00242509	78.7288
	High	0	42.92	0.00372158	67.4188
	High	0	42.23	0.00310576	130.677
	High	0	37.82	0.00925099	61.2008
	High	0	35.27	0.0173397	55.7808
	High	0	31.87	0.0227545	40.1955
	Medium	0	31.68	0.0450991	118.92
	High	0	30.01	0.00624474	32.0084
	High	0	29.2	0.0230835	31.311
	Medium	0	26.91	0.0319816	11.6595
IPI00656204.1	Isoform 2 of Nck-associated protein 1				118.442
	A2	ΔCn	IonScore	Exp Value	RT [min]
	High	0	33.49	0.0249152	28.888
IPI00845608.1	Isoform 2 of Nestin				201.648
	A2	ΔCn	IonScore	Exp Value	RT [min]
	High	0	95.18	1.67926e-08	80.1249
	High	0	65.55	1.62292e-05	80.7841
	High	0	61.81	5.18111e-05	69.5902
	High	0	58.12	9.12687e-05	57.898
	High	0	57.16	0.000125866	69.8222
	High	0	56.52	0.000128024	84.0237
	High	0	49.9	0.000401642	78.5669
	High	0	46.01	0.00202118	38.5346
	High	0	45.07	0.00114044	30.9477
	High	0	42.1	0.00460288	55.0638
	High	0	42.08	0.00444759	76.6068
	High	0	38.78	0.00199313	113.482
	High	0	36.24	0.00871112	20.4088
	High	0	36.01	0.0164902	64.4213
	High	0	32.74	0.0145532	96.79
	Medium	0	32.73	0.0358934	103.887
	Medium	0	32.64	0.0334869	17.0986
	High	0	32.02	0.0176798	32.773
	Medium	0	31.73	0.0407893	55.6114
	High	0	31.28	0.00633022	115.257
	Medium	0	31.14	0.0493782	27.3109
	Medium	0	29.12	0.0357588	71.609
	A2	ΔCn	IonScore	Exp Value	RT [min]
	High	0	37.42	0.0131866	73.806
IPI00404434.1	Isoform 2 of Phosphatidylinositol-binding clathrin assembly protein	protein binding	nucleus; cytoplasm; endosome; Golgi; membrane; cytoskeleton	transport; development; cell differentiation; cell organization and biogenesis; regulation of biological process; metabolic process	64.607
	A2	ΔCn	IonScore	Exp Value	RT [min]
	Medium	0	28.78	0.0476101	115.577
IPI00867783.2	Isoform 2 of Pleckstrin homology domain-containing family G member 3	enzyme regulator activity; protein binding		cell communication; regulation of biological process; response to stimulus	148.251
[truncated: 2,219 more rows]
